1 **Title: A Systems Pharmacology Approach based on**  
2 **Oncogenic Signalling Pathways to Determine the**  
3 **Mechanisms of Action of Natural Products in Breast**  
4 **Cancer from Transcriptome Data**

5 **Running title: Systems pharmacology for drugs in breast**  
6 **cancer**

7 **Abstract**

8 **Background**

9 Plant-derived natural products possess poly-pharmacologic  
10 mechanisms of action with good tolerability and thus are  
11 appropriate in the management of complex diseases, especially  
12 cancers. However, methodological limitations impede attempts  
13 to catalogue targeted processes and infer systemic mechanisms  
14 of action. Integrative systems biology approaches are better  
15 suited in these cases due to their analytical comprehensiveness.

16 **Method**

17 The transcriptome data from drug-treated breast cancer cell  
18 lines were mapped on human protein interactome to construct  
19 targeted subnetworks. The subnetworks were analysed in terms  
20 of enriched oncogenic signalling pathways by reducing  
21 redundancy through pathway-pathway interaction networks,  
22 and the filtered pathways were mapped on oncogenesis  
23 processes.

## 1 **Results**

2 The signalling pathways regulated by the pleiotropic effects of  
3 Actein, Withaferin A, Indole-3-Carbinol and Compound  
4 Kushen were found to be projected on a set of oncogenesis  
5 processes at the transcriptomic level in different breast cancer  
6 subtypes (triple negative, luminal A and HER2+). Notably,  
7 these compounds indirectly regulated known oncogenes in the  
8 different subtypes through their associated pathways in the  
9 subnetworks.

## 10 **Conclusion**

11 The proposed approach infers the mechanisms of action from  
12 enriched subnetworks and oncogenic signalling pathways and  
13 provides a systematic approach for evaluating poly-  
14 pharmacologic compounds.

## 15 **Background**

16 While reductionist-based approaches generated much of the  
17 drugs and drug targets known today, drug-human interactions  
18 are rather complex since the mechanism of action of most  
19 pharmacologically effective drugs results from the perturbation  
20 of multi-dimensional cellular networks<sup>1</sup>. Thus, a phenotypic  
21 change following a treatment is the result of regulation  
22 cascades covering various biomolecular interactions, which can  
23 be traced in omics scale<sup>1,2</sup>. Within this scope, several studies  
24 have utilized transcriptomic data to generate novel hypotheses

1 from drug perturbations in various diseases. In order to  
2 decipher meaningful information from such high-throughput  
3 perturbation data, novel computational approaches in the  
4 context of systems biology need to be applied<sup>2</sup>.

5 Most cancers are driven by multiple genetic mutations and  
6 epigenetic dysregulations<sup>3,4</sup> interconnected by biomolecular  
7 players. Breast cancer is the most prevalent form of cancer in  
8 women. Distinct subtypes have been defined for this cancer,  
9 and inter-group subtle genetic variations are known to exist.  
10 Owing to the understanding of the existence of somatic  
11 mutations that aggregate in a few signaling and regulatory  
12 pathways<sup>5</sup>, a number of small molecule targeted therapies have  
13 been developed for breast cancer in the last decade. However,  
14 treatment success rates above 40% are yet to be recorded<sup>6</sup>. A  
15 plausible explanation is the inherent oncogenic signaling  
16 pathway cross-talks and the bypass of targets by alternative  
17 activating pathways. This explicitly points to a need for multi-  
18 targeted therapeutic approaches.

19 Experimental evidences from separate molecular biology  
20 studies on the use of plant-based drugs in cancer cells have  
21 strongly suggested a multi-targeting therapeutic strategy. In  
22 fact, ancient civilizations relied on plant-based drugs due to  
23 their low systemic toxicities and ability to simultaneously treat  
24 multiple diseases<sup>7</sup>. Justifiably, current systems biology analyses  
25 through differential gene expression enumerations have

1 confirmed similar observations. Yet, despite their observed  
2 anti-cancer effects, no attempt has been made to integrate  
3 transcriptome-level response to these drugs with molecular  
4 interaction networks to systemically evaluate the mechanism of  
5 action of these drugs. Emboldened by the idea that co-regulated  
6 and co-expressed biomolecules tend to converge on well-  
7 defined biological pathways, we hypothesised that genes  
8 targeted by plant-based drugs form unique subnetworks;  
9 enriched with oncogenic signaling pathways critical in  
10 regulating information flow in response to drug treatment. To  
11 test such a hypothesis, we envisioned a framework for  
12 cataloguing all the molecular players in a perturbed subnetwork  
13 module and using the resulting observations to devise an  
14 approach for elucidating the mechanism of action of plant-  
15 based compounds.

16 Network biology is a holistic approach in systems biology to  
17 understand biological systems, where biomolecules and their  
18 binary interactions are projected onto a graph to depict  
19 molecular relationships<sup>8</sup>. Nowadays, concurrent integration of  
20 experimentally-derived omics data with a priori interaction data  
21 is a common approach in systems biology to obtain context-  
22 specific subnetworks<sup>9</sup>. To this end, a number of computational  
23 tools have been proposed by different groups to map and  
24 construct subnetworks from transcriptome data<sup>10</sup> and applied to  
25 several diseases, including breast cancer<sup>11</sup>, hepatocellular

1 carcinoma<sup>12,13</sup>, liver fibrosis<sup>14</sup> and neurodegenerative  
2 diseases<sup>15</sup>.

3 In this study, we developed a data-centric computational  
4 framework for determining the mechanism of action of poly-  
5 pharmacologic compounds as plant derived natural products.  
6 To demonstrate its application, we mapped the compound-  
7 treated breast cancer transcriptome data (actein<sup>16</sup>,  
8 compound kushen injection (CKI)<sup>17</sup>, indole-3-carbinol<sup>18</sup> and  
9 Withaferin A<sup>19</sup>) on protein interactome and constructed the  
10 underlying subnetworks, and used network topology metrics for  
11 validation. Subsequently, we performed pathway enrichment to  
12 extract enriched signalling pathways, which were used to  
13 define the mechanisms of action of each drug by constructing  
14 pathway interactomes and by mapping them on carcinogenesis  
15 processes. Overall, we showed that these compounds possess  
16 pleiotropic properties and targets oncogenic signaling pathways  
17 and carcinogenesis processes. Notably, we found that multiple  
18 perturbed oncogenic signaling pathways coordinate to control a  
19 common carcinogenesis process.

20

## 21 **Methods**

22 The computational analysis steps utilized in this study are  
23 summarized in **Figure 1**.

## 24 **Data acquisition**

25 We used a structured query statement to interrogate and  
26 download gene expression datasets for the breast cancer cell  
27 lines treated with withaferin A (GSE53049)<sup>19</sup>, actein  
28 (GSE7848)<sup>16</sup>, CKI (GSE78512)<sup>17</sup> and indole-3-carbinol

1 (GSE55897)<sup>18</sup> from the NCBI GEO depository. We selected  
2 these four plant-based drugs among others since the  
3 corresponding datasets had at least 3 control and 3 treatment  
4 groups, and there was a distinct separation between the control  
5 and treatment groups (tested using the unsupervised dimension  
6 reduction method, principal component analysis).

### 7 **Data processing and differential gene expression analysis**

8 The expression datasets included microarray expression  
9 profiles and RNA-seq counts and, therefore, platform specific  
10 protocols were followed. For the microarray derived datasets  
11 (withaferin A, actein and indole-3-carbinol), probeset mapping  
12 was performed by choosing the probe with the maximum  
13 average expression value among multiple probesets of a gene.  
14 For RNA-seq data (CKI), we selected only those genes with  
15 above zero counts in at least two samples in either control or  
16 treatment group. Overall, we log<sub>2</sub> normalized all the pre-  
17 processed datasets. Subsequently, we used LIMMA<sup>20</sup> package  
18 in R to identify differentially expressed genes between the  
19 treated versus control (untreated) groups. We used Benjamini-  
20 Hochberg p-value correction to control false discovery rates  
21 (FDR). Fold change and FDR cut-offs were simultaneously  
22 used to select differentially expressed genes.

### 23 **Active subnetwork scoring and construction using**

### 24 **KeyPathwayMiner**

1 The challenge of discovering most-connected drug specific  
2 subnetworks in the human protein-protein interaction network  
3 was solved using KeyPathwayMiner (KPM)<sup>21</sup>, one of the tools  
4 reported to have a high performance among subnetwork  
5 discovery methods<sup>10</sup>. In this approach, given a priori protein-  
6 protein interaction network (PPIN), we were interested in a  
7 maximally connected clique based on a significance score.  
8 Hence, we treat this problem as an optimization problem with  
9 two main constraints: (i) the maximum allowable non-  
10 differentially expressed genes, and (ii) the significance cut-off.  
11 In this work, we used the Cytoscape (v3.7.1) based KPM  
12 (v5.0.1) plugin.

13 In our analysis, we made a few modifications to the input data  
14 and constraints as we describe next. We applied a uniform fold-  
15 change cut-off of 2 and a varied FDR cut-off of  $5 \times 10^{-3}$  (for  
16 indole-3-carbinol and withaferin A) or  $1 \times 10^{-2}$  (for actein and  
17 CKI) to identify differentially expressed genes. Thus, our  
18 approach is strict; with the intention of reducing the rate of  
19 false positives and retaining only important features . These  
20 two cut-offs were used to assign binary values to all the genes  
21 in a dataset. Specifically, we used '1' to denote differentially  
22 expressed genes based on our criteria, and '0' for other genes.  
23 In the subnetwork construction, significantly changed and  
24 physically interacting proteins are used. These interconnected  
25 proteins essentially denote drug-targeted cellular pathways. We

1 allowed a maximum of 5 non-differentially expressed genes in  
2 each subnetwork solution, a parameter available in KPM. For  
3 the priori human PPIN, we used BioGRID<sup>22</sup> (release 3.5.173;  
4 25<sup>th</sup> March, 2019) containing 22 435 proteins and 478 529  
5 interactions.

## 6 **Subnetwork analysis and prospective validation of high** 7 **centrality genes**

8 Using CytoNCA (v2.1.6)<sup>23</sup> Cytoscape plugin, we analysed two  
9 network topological features to identify the major genes in the  
10 subnetworks: degree and betweenness centrality. Next, we used  
11 the TCGA breast cancer RNA-Seq data to investigate the  
12 prognostic values of the top 5 (based on high degree and  
13 betweenness centrality) identified genes. Specifically, we used  
14 the online tool KM-Express<sup>24</sup> to determine the effect of the  
15 identified genes on overall survival and their association with  
16 samples from normal, primary and metastatic cases. For the  
17 overall survival, the tool uses the median gene expression  
18 across all samples and a hazard ratio to infer statistical  
19 significance based on log-rank p-value. A p-value cut-off of  
20 0.05 was used in this study.

## 21 **Pathway enrichment analysis**

22 We used enrichR<sup>25</sup> package in R to perform pathway  
23 enrichment analysis for the respective subnetwork nodes  
24 (genes). It takes pathway definitions from Kyoto Encyclopaedia



1 of Genes and Genomes (KEGG), WikiPathway, Reactome and  
2 Gene Ontology Biological Process (GO-BP) databases, among  
3 others. We limited our results to the enriched pathways with an  
4 FDR cut-off of 0.05 and containing the terms: ‘signal’,  
5 ‘apoptosis’, and ‘cell cycle’. Also, those pathways with less  
6 than 3 associated genes were removed at this step.

### 7 **Construction of pathway-pathway interaction network**

8 Oncogenic signaling pathways do not function in isolation but  
9 are known to crosstalk with each other while redirecting  
10 cellular processes. Construction of pathway interaction  
11 networks has been previously applied to visually elaborate the  
12 pathway-pathway interrelationships and infer associated  
13 biological phenomenon<sup>26,27</sup>. On the other hand, since pathway  
14 enrichment via enrichR was based on multiple pathway  
15 databases, redundant pathways were inevitable in the  
16 enrichment results. Therefore, pathway-pathway similarity can  
17 also be used to identify redundant pathways. One approach to  
18 computationally enumerate such relationships is to evaluate the  
19 degree of pathway-pathway overlap based on gene similarities  
20 in any given two pathways. We used the Jaccard index; which  
21 is a measure of the similarity between a pair of sets. Here,  
22 given two pathways,  $P_i$  and  $P_j$ , with enriched gene sets,  $G_i$  and  
23  $G_j$ , we computed the Jaccard index ( $J$ ) using the formula below:

$$24 \quad J(P_i, P_j) = \frac{|G_i \cap G_j|}{|G_i \cup G_j|} \quad (\text{eq. 1})$$

1 This evaluates to the number of genes common in the two  
2 pathways divided by the total number of genes in both  
3 pathways without repeats. Hence, Jaccard index takes values  
4 between 0 and 1, and, using this metric, the proportional  
5 similarity between two pathways can be deduced. Here, we  
6 defined two pathways to be either in crosstalk or similar based  
7 on their Jaccard scores. We relied on a cut-off of 0.60 and 0.25  
8 to infer pathway redundancy and pathway crosstalk  
9 respectively. Since we used multiple pathway databases  
10 (KEGG, GO-BP, WikiPathways and Reactome pathway  
11 definitions) in our analysis, which increased the possibility of  
12 pathway redundancies, this approach allowed us to prioritize a  
13 family representative for redundant pathways, effectively  
14 eliminating sub-pathways originating from the same pathway  
15 database. To graphically illustrate the outcome of the Jaccard  
16 analysis and visually inspect the pathways for prioritization, we  
17 used the igraph R package<sup>28</sup> to construct pathway-pathway  
18 interaction network as we describe later. The pathway  
19 definitions were used as the network nodes while a cut-off of  
20 0.25 was used to insert an edge between any pathways with at  
21 least 25% common genes. Furthermore, we used greedy  
22 optimization algorithm in igraph to define clusters in a  
23 pathway-pathway interaction network.

## 24 **Oncogenic signaling pathway inference**

1 Using the pathway-pathway interaction networks, we applied a  
2 two-tier approach to infer biological significance. First, we  
3 relied on the 10 canonical oncogenic signaling pathways from  
4 the comprehensive pathway analysis by the TCGA Pan-Cancer  
5 Consortia<sup>29</sup>, which are cell cycle, Hippo, Myc, Notch, NRF2,  
6 PI-3-Kinase/Akt, RTK-RAS-MAPK, TGF-beta P53 and  $\beta$ -  
7 catenin/Wnt signalling pathways. Among the terms identified  
8 in our enrichment analysis, we selected the terms that were  
9 semantically related to the aforementioned canonical pathways  
10 as drug-targeted signaling pathways. Subsequently, we grouped  
11 such terms into three broad clusters depicting the main cancer  
12 pathophysiologic processes: (i) cell cycle, proliferation and  
13 apoptosis, (ii) cell metastasis and invasion, and (iii)  
14 angiogenesis<sup>30</sup>.

## 15 **Results**

### 16 **Construction of drug responsive protein interaction** 17 **subnetworks from transcriptome data**

18 Breast cancer is molecularly classified into three main  
19 subtypes: luminal (A and B), triple negative and human  
20 epidermal receptor 2 positive (HER2+); based on hormone  
21 receptor and HER2 expression<sup>31</sup>. While the datasets used in this  
22 study included representative cell lines from the three subtypes,  
23 they differ on the transcriptomic platforms used to collect the  
24 data and the drug applied. Nevertheless, we believe that the  
25 approach applied here captures the systemic drug effects and is

1 enough to study the pleiotropic nature of plant derived drugs.  
2 We summarise these datasets in **Supplementary Table 1**. In  
3 general, our datasets include luminal A (T47D, MCF-7,  
4 ZR751), triple negative (MDA-MB-231, MDA-MB-157 and  
5 MDA-MB-436) and human epidermal receptor 2 positive  
6 (MDA-MB-468) breast cancer cell lines treated with at least  
7 one of indole-3-carbinol, Withaferin A, CKI and Actein. The  
8 Principal Component Analysis results showing separate  
9 grouping of treatment and control samples is available as  
10 **Supplementary Figure 1**. To identify drug affected genes, we  
11 performed differential gene expression analysis. We relied on  
12 fold change and FDR scores as cut-offs for significance; which  
13 were eventually used for data binarization for KPM analysis, as  
14 described in the Methods section. Corresponding numbers of  
15 differentially expressed genes are given in **Supplementary**  
16 **Table 2**.

17 Network mapping and subnetwork scoring approaches have  
18 been extensively used in integrative biology field to discover  
19 active disease- and drug-specific modules in various  
20 experiments<sup>10,21,32,33</sup>. To elucidate the molecular effects of plant  
21 derived drugs in breast cancer, we constructed the active  
22 subnetworks from transcriptome data using  
23 KeyPathwayMiner<sup>32</sup>. Concurrently, using the same approach  
24 and parameters, we also constructed active subnetworks from  
25 the up- and down-regulated genes separately. The number of

1 proteins and their interactions for all the subnetworks solutions  
2 are reported in **Table 1**.

3 Overall, we observed a compound- and breast cancer subtype-  
4 specific number of proteins and their interactions. Thus, it is  
5 deducible that the different drugs studied had substantial  
6 differential effects on the activity of the underlying protein  
7 interaction networks in the disease conditions. With the  
8 differences in the number of targeted proteins, this deduction  
9 reinforces the dominant idea that no two drugs have a similar  
10 mechanism of action in complex diseases<sup>2,34</sup>. As expected, the  
11 role of molecular heterogeneity of the different breast cancer  
12 subtypes in drug response can be explicitly delineated from the  
13 sizes of the subnetworks. For instance, under indole-3-carbinol,  
14 in terms of the number of enriched genes, a relatively higher  
15 number was targeted by LA than TN, while the reverse was  
16 observed under Withaferin A treatment of LA and TN cell  
17 types (**Table 1**). The current drug research regime focusses on  
18 targeted therapy (famously defined as ‘magic bullets’)<sup>2,34</sup>.  
19 However, with the increasing acceptance of the poly-  
20 pharmacologic paradigm as an effective approach in the  
21 treatment of complex diseases, our network analysis results  
22 indicate that the analysed compounds target multiple proteins  
23 simultaneously to exert their effects in a network-centric a  
24 multi-targeting mechanism. This observation would be

1 beneficial under disease conditions, particularly if the cohort of  
2 targeted proteins can be linked to or are known disease drivers.

3 **The drug-specific subnetworks capture key breast cancer**  
4 **carcinogenesis-related genes as revealed by prospective**  
5 **prognostic prediction using network topology analysis.**

6 An overarching question is whether the genes enriched in the  
7 subnetwork solutions have any significance in breast cancer  
8 prognosis. In therapeutic terms, effective anti-carcinogenic  
9 drug candidates are known to regulate a niche of known proto-  
10 oncogenes in a disease network. To address this, network  
11 centrality measures can be used to identify topologically  
12 important target vertices (genes) in the subnetwork solutions<sup>35</sup>.  
13 In disease networks under compound perturbations, such genes  
14 are significantly enriched as a result of the condition  
15 (treatment) change. In this study, with the aim to prospectively  
16 validate the constructed subnetworks, we used CytoNCA<sup>23</sup> to  
17 extract the top five genes based on both high betweenness and  
18 degree centralities from each subnetwork. The result from this  
19 analysis is reported in **Table 2**. Betweenness and degree  
20 centrality scores of all genes in the subnetworks are given in  
21 **Supplementary Table 3**. Subsequently, we analysed the top-  
22 five genes by using the KM-Express<sup>24</sup> tool for their association  
23 with overall survival and for their relationship with  
24 pathological stages (median expression in normal, tumor and  
25 metastasis states).

1 In general, we found 11 unique genes from all the subnetworks.  
2 Five of these genes (APP, TRIM25, ELAVL1, HNRNPL and  
3 ESR2) were found to be the most frequent across all  
4 subnetworks (**Table 2**). Since we had allowed the parameter  
5  $K = 5$  in KPM-based subnetwork extraction, top five genes  
6 mainly consisted of non-significantly expressed but highly  
7 connected genes in response to treatment. Coincidentally, they  
8 had the highest betweenness centrality scores as well. Survival  
9 analysis found APP, TRIM25 and ELAVL1 to have significant  
10 associations with overall survival (log-rank p-value < 0.05) in  
11 breast cancer. Overexpression of APP and TRIM25 in cancer  
12 patients was associated with low overall survival and the  
13 reverse was true for ELAVL1 (**Supplementary Figure 2a-c**).  
14 In the literature, APP is a well-established cancer biomarker, a  
15 target of ADAM10, and has been strongly linked with breast  
16 cancer growth, metastasis and migration<sup>36</sup>. A comprehensive  
17 study identified TRIM25 as a key gene in regulating TN breast  
18 cancer metastasis<sup>37</sup>. ELAVL1 codes for an RNA binding  
19 protein controlling multiple facets of carcinogenesis, and  
20 literature reports show its over-expression to be associated with  
21 adverse-event free tumors<sup>38</sup>. Indeed, our current finding  
22 concurs that its low expression in cancer patients correlates  
23 with low overall survival and that over-expression may increase  
24 the patient overall survival. On the other hand, HNRNPL and  
25 ESR2, which have been reported to be associated with breast

1 cancer elsewhere<sup>39</sup>, were not significantly associated with  
2 patient survival at the median gene expression cut-off.  
3 However, further interrogation revealed their significant  
4 association with overall survival at 75% vs 25% (high vs low)  
5 and 75% gene expression cut-offs respectively  
6 **(Supplementary Figure 2d-e)**. From **Supplementary Figure**  
7 **2f-j**, high expression levels of TRIM25 is associated with  
8 metastatic tumors while that of ELAVL1 is associated with  
9 primary tumors. The expression of APP, on the other hand,  
10 decreases in both primary and metastatic tumors., We found  
11 TRIM25 to be indirectly targeted by all the compounds, except  
12 in MDA-MB-231 under indole-3-carbinol (Figure 2). Also,  
13 under indole-3-carbinol treatment, APP was not present  
14 amongst the top-five genes in MDA-MB-231 and MDA-MB-  
15 157, indicating a transcriptome deviation from the other  
16 TNBC-specific cell line, MDA-MB-436.

17 These findings indicate that these plant-derived compounds  
18 target gene subnetworks driven by well-established oncogenes.  
19 Importantly, the plant-based compounds exert their effects not  
20 directly through the central oncogenes but by perturbing a high  
21 number of their first neighbours to modify the underlying  
22 physiological conditions. This protein-disease-prognosis  
23 consistency is a validation of the efficiency of the applied  
24 method to capture biologically informative protein networks  
25 and shows the effectiveness of the compounds in cancer,



1 permitting the constructed subnetworks as viable in hypothesis  
2 generation.

3 **Actein, indole-3-carbinol, CKI and Withaferin A target**  
4 **multiple oncogenic signaling pathways which coordinate to**  
5 **influence cellular processes.**

6 The current pharmacokinetics and pharmacodynamics studies  
7 are highly efficient in elucidating the mechanism of action of  
8 anti-microbial drugs. However, studies have consistently  
9 demonstrated that this simple framework is inefficient in  
10 addressing drug action in complex and multi-factorial disease  
11 systems. In such systems, limiting drug research to targeting  
12 single disease biomarkers is one of the main causes of drug  
13 failures in clinical trials<sup>1,2,40</sup>. Drug induced reprogramming of  
14 cellular responses is directed through metabolic reactions,  
15 which are regulated by signaling pathways enormously  
16 enriched in protein-protein interactions. Thus, undeniably,  
17 studying drug effects on cellular pathways provides a holistic  
18 approach as to the molecular targets of drug candidates. Given  
19 the increased preference by tumors for only a handful number  
20 of such pathways, a sound anti-carcinogenic effect can thus be  
21 deduced by evaluating their activity upon treatment. A recent  
22 study evaluating oncogenesis related pathways based on gene  
23 profiling in various cancers<sup>29</sup> provides a foundation for  
24 systemically evaluating the therapeutic relevance of drug-  
25 responsive pathways upon treatment in various tumors.

1 The pleiotropic nature of plant-derived drugs in cancer is well  
2 anchored in literature<sup>7,41</sup>. However, linking drug targeted  
3 networks from transcriptome data with oncogenesis processes  
4 to study the mechanism of action of natural products as a  
5 holistic approach has not been explored systematically. Thus,  
6 we reasoned that taking such an approach would present a  
7 novel method to studying the poly-pharmacologic compounds.

8 In this section, we aimed to comprehensively catalogue drug  
9 targeted oncogenic signaling pathways and their corresponding  
10 oncogenesis processes. In summary, the following procedure  
11 was followed: (i) pathway enrichment was applied to all the  
12 genes in a subnetwork, (ii) only oncogenic signaling pathways  
13 were retained, (iii) to identify and filter out redundant pathways  
14 coming from different databases, pathway-pathway correlation  
15 networks were constructed (iv) the final list of pathways were  
16 mapped on three major oncology related processes based on  
17 their semantic similarity to the 10 canonical oncogenic  
18 signalling pathways<sup>29</sup> (see **Methods** section).

19 As described in the methods section, we performed pathway  
20 enrichment analysis using the genes in each identified  
21 subnetwork. An important factor in this systemic approach is  
22 the interconnectivity of the proteins used in pathway  
23 enrichment analysis. Thus, it is obvious that the enriched  
24 pathways are connected due to the shared targeted-network  
25 proteins. To illustrate this, first we eliminated all those

1 pathways which were unrelated to cancer. **Supplementary**  
2 **Table 4 and Supplementary Table 5** report the enriched  
3 pathways from this analysis. Then we constructed unweighted  
4 pathway-pathway interaction networks based on common  
5 proteins shared between different pathways. We relied on a  
6 Jaccard similarity index of at least 25% to denote pathway  
7 crosstalk (through intersecting genes) and represented this by  
8 placing an edge between them in the network. **Figure 2a-b and**  
9 **Supplementary Figure 3a-g** shows the networks of various  
10 drug targeted pathways from the four drugs studied. This  
11 clustering allowed us to (i) prioritise meaningful signaling  
12 pathway terms for mapping on oncogenesis processes thus  
13 reducing redundancy (the pathways with  $J > 0.60$ ), and (ii)  
14 illustrate pathway-pathway crosstalk (interdependence) in a  
15 drug-targeted network. We reckon that this approach is much  
16 simpler and precise compared to Chen et al.<sup>42</sup>'s gene overlap  
17 index approach for pathway prioritisation.

18 We observed a characteristic clustering of related pathway  
19 terms across the various enrichment results. For instance, in the  
20 actein treated MDA-MB-453 dataset, we identified 10 pathway  
21 clusters out of 21 enriched pathways; only 5 of these (NRF2,  
22 Cell cycle, Apoptosis, Interferon signaling and TGF-beta) were  
23 identified as members of the defined oncogenic signaling  
24 pathways (see Methods). An examination of the various  
25 pathway clusters from all the datasets revealed two important

1 features: (i) the clustered pathways were either semantically  
2 related or from the same database with similar functions, as is  
3 the case of ‘NRF2’ and ‘Nuclear receptor meta-pathway’  
4 pathways in **Figure 2a** ( $J>0.60$ , pathway redundancy), and (ii)  
5 the interacting pathways are well-known to interact in literature  
6 acting as sub-pathways through the activation of the main  
7 pathway, as is the case of ‘apoptosis’, ‘TNF’ and ‘IL17’ in  
8 **Figure 2b** (pathway crosstalk), which is expected<sup>43</sup>. The  
9 pathway-pathway interaction networks from the other datasets  
10 are reported in **Supplementary Figure 3a-g**.

11 Next, to infer biological significance, we applied a two-tier  
12 approach. First, we relied on the predefined canonical  
13 oncogenic signaling pathways (see **Methods** section)<sup>29</sup> for the  
14 concise terms. Additionally, though not captured in the  
15 TCGA<sup>29</sup> analysis of the most frequently mutated canonical  
16 oncogenic signaling pathways since it is a response mechanism  
17 to foreign system, the role of the immune system signaling as a  
18 secondary response mechanism in cancer is significant and can  
19 be attributed to the inhibition/promotion of tumor initiation and  
20 metastasis in advanced cases. Thus, immune system related  
21 pathway terms were also included in the analysis results based  
22 on the known physiological roles of both the pathways and  
23 their enriched genes. Subsequently, we used pathway  
24 enrichment analysis results from the up-/down-regulated  
25 subnetworks (**Supplementary Table 5**) to assign these

1 pathways as either up- or down-regulated. Eventually, with  
2 clear pathway clusters and only canonical-signaling-pathways  
3 relevant non-redundant terms, we mapped the resulting  
4 pathway terms on the three categories derived from major  
5 oncogenesis processes: (i) cell cycle, proliferation and  
6 apoptosis, (ii) cell metastasis and invasion, and (iii)  
7 angiogenesis. However, given the overlapping roles different  
8 pathways perform in biological systems, deciphering the  
9 affected processes is not straightforward. Therefore, to assign a  
10 pathway to either of the three groups, we looked up for the  
11 functional role(s) of the associated genes (both up- and down-  
12 regulated) in UniProtKB<sup>44</sup> database. To deduce the targeted  
13 biological processes, we relied on those genes whose molecular  
14 functions match the biological roles of the pathways provided  
15 in literature. **Table 3** details the results of this grouping. To  
16 illustrate this approach, we provide a detailed description of the  
17 grouping as applied to the actein treated MDA-MB-453 cell  
18 line in **Supplementary Table 6** using enrichment results from  
19 Supplementary Table 5 and the pathway-pathway interaction  
20 networks (**Figure 2a, b** and **Supplementary Figure 3a-g**).

## 21 **Discussion**

22 Systems pharmacology has evolved as a data-driven approach  
23 to bridge the gap between the increasing amounts of  
24 compound/drug perturbation data and drug discovery through  
25 systematic evaluations<sup>34,45</sup>. It gives new perspectives to

1 drug/compound treated clinical and experimental publicly  
2 available omics data through well-grounded bioinformatics data  
3 analysis pipelines, speeding up the rate of understanding of the  
4 molecular mechanisms of action to identify targets of drug  
5 candidates<sup>1,2,46</sup>. In this study, we developed and implemented a  
6 computational analysis framework that relies on mapping  
7 transcriptome data on protein interactome and constructing  
8 targeted subnetworks, and subsequent mapping of enriched  
9 pathways in the subnetworks on carcinogenesis processes  
10 (**Figure 1**). For poly-pharmacologic compounds, this approach  
11 projects the cellular behaviour in response to treatment on a  
12 physical interaction network; thereby, simplifying inference of  
13 mechanism of action from omics data. Next, we discuss the  
14 main findings with literature evidences on the studied  
15 compounds.

16 Actein is a widely studied natural triterpene glycoside that has  
17 recently attracted attention in breast cancer due to its effects on  
18 various biological processes in cancer<sup>16,47-49</sup>. In this study, cell  
19 death and cell cycle roles of TGF-beta, PI3K-Akt-mTOR and  
20 NRF2 pathways were up-regulated while proliferation roles of  
21 TGF-beta pathway were down-regulated. Additionally, tumor  
22 microenvironment regulation through interferon signaling  
23 pathway was down-regulated (**Table 3**). Available reports on  
24 breast and other cancers indicate that actein targets cell  
25 apoptosis<sup>48,50</sup>, cell adhesion<sup>49</sup> and migration<sup>49,50</sup>. This analysis

1 showed actein to target oncogenic signalling pathways mainly  
2 regulating cell cycle, proliferation and apoptosis processes in  
3 this cell type.

4 CKI is an ancient formulation in the Chinese pharmacopoeia;  
5 derived from a mixture of *Radix sophorae flavescentis* and  
6 *Rhizoma smilactis glabrae* herbs. Mixed results have been  
7 reported in breast cancer<sup>51</sup>. Here, we found CKI to down-  
8 regulate P53 pathway which is in line with a previous  
9 observation of P53 independent apoptotic cell death<sup>17</sup>, and up-  
10 regulate RTK-RAS-MAPK (EGFR, p38 and ErbB), PI3K-Akt-  
11 mTOR, NRF2 and TGF-beta pathways in MCF-7. These  
12 pathways regulate cell proliferation and apoptosis (P53, RTK-  
13 RAS-MAPK, PI3K-Akt-mTOR and NRF2) and  
14 metastasis/invasion (TGF-beta). Moreover, CKI also targets  
15 angiogenesis and tumor microenvironment regulating pathways  
16 through VEGFA/VEGFR2 and cytokine signaling (B cell  
17 receptor, T cell receptor and FC-epsilon signaling) respectively  
18 (**Supplementary Table 5**), which is consistent with a previous  
19 finding<sup>52</sup>. Other reports have shown that CKI directly regulates  
20 cell migration<sup>53</sup>; and apoptosis in breast cancer<sup>52</sup>. Cell cycle,  
21 proliferation and apoptosis, metastasis/invasion, and  
22 angiogenesis were the main targeted carcinogenesis processes  
23 in this cell line (**Table 3**).

24 Indole-3-carbinol is a phytohormone derived from cruciferous  
25 vegetables and is a breakdown product of glucosinate 3-

1 ylmethylglucosinate compound. Its therapeutic effectiveness is  
2 well defined in oestrogen receptor driven cancers<sup>54,55</sup>. In LA  
3 cell types, we mapped the pathways on cell proliferation and  
4 apoptosis (Wnt, cell cycle, Notch and TGF-beta) and  
5 invasion/metastasis (TGF-beta, Wnt and Notch).  
6 Characteristically, TGF-beta regulating metastasis/invasion was  
7 down-regulated in T47D and MCF-7 while its cell death  
8 promoting role was up-regulated in T47D and down-regulated  
9 in ZR751 (**Table 3** and **Supplementary Table 5**). All the three  
10 categories of carcinogenesis processes were targeted (**Table 3**).  
11 The role of indole-3-carbinol on TN is less studied, however  
12 low efficacy in this subtype has been noted<sup>18</sup>. Accordingly,  
13 here no oncogenic signaling pathway was enriched in the  
14 MDA-MB-157 subnetwork; illustrating an indole-3-carbinol -  
15 specific non-responsive subtype. This tumor subtype is known  
16 to be resistant to most chemotherapeutic interventions<sup>56</sup>.  
17 Nonetheless, more MDA-MB-436 signaling pathways were  
18 targeted by indole-3-carbinol than in MDA-MB-231 subtype  
19 (**Supplementary Table 5**); and they control carcinogenesis  
20 through cell cycle, proliferation and apoptosis,  
21 metastasis/invasion, and angiogenesis processes (**Table 3**).  
22 Withaferin A is a steroidal lactone belonging to the withanolide  
23 group of compounds derived from *Withania somnifera*. It is a  
24 vital component of the Indian Ayurvedic medicine. The  
25 characteristic anti-cancer effects of Withaferin A is well



1 anchored scientific reports<sup>57-60</sup> and specifically in breast  
2 cancer<sup>19,58,61,62</sup>. Here, RTK-RAS-MAPK, TGF-beta, NRF2 and  
3 P53 oncogenic signaling pathways were targeted in both TN  
4 and LA. Tumor subtype specificity on Wnt, Notch, VEGFA-  
5 VEGFR2 and PI3K-Akt-mTOR in TN and cytokines in LA  
6 were observed (**Table 3**). Moreover, cytokine mediated  
7 signaling in both cells was also targeted. The up-regulation of  
8 NRF2 pathway genes as observed is consistent with *in vivo*  
9 findings of induced oxidative stress in the two cell lines<sup>58,63</sup>.  
10 These results illustrated multi-targeting of several  
11 carcinogenesis processes, including cell proliferation and death,  
12 metastasis/invasion and angiogenesis (**Table 3**) in both TN and  
13 LA associated with phenotypes reported in *in vitro*  
14 studies<sup>19,58,61,62,64</sup>.

15 Whereas this work attempts to associate the various targeted  
16 networks with carcinogenesis processes to explain the  
17 mechanism of action of poly-pharmacologic compounds, a  
18 major limitation arises on enumerating their therapeutic values.  
19 For instance, enrichment of a pathway in either up- or down-  
20 regulated subnetworks may not necessarily be directly  
21 translated as activation or inactivation of the related pathway-  
22 defined cellular process, as the same process may be targets of  
23 other co-/dys-regulated pathways by the same drug. However,  
24 the *in vitro* reports on the activity of different drugs on cell  
25 lines<sup>16-19</sup> provides a validation for the current study. To

1 increase the robustness of this approach, we propose future  
2 integration of more omics data to provide a more precise  
3 picture on the exact mechanism of action of natural products<sup>65</sup>.

4 Another challenge experienced in this approach is the un-  
5 directionality of protein interactomes. Thus, given the inherent  
6 directionality in signalling pathways, our future studies will  
7 incorporate directed networks from an ensemble of databases,  
8 by drawing on their comprehensiveness to construct all-  
9 inclusive interaction networks.

10 Additionally, given the poly-pharmacologic properties found  
11 here, simulations on the effect of different combinations to  
12 determine synergistic and antagonistic combinations and side-  
13 effects would provide more information. Regan-Fendt *et al.*<sup>66</sup>  
14 recently developed a computational drug combination analysis  
15 using transcriptome data and disease specific root genes for  
16 malignant melanoma and successfully predicted vemurafenib  
17 and tretinoin as synergistic therapeutic combinations. Variants  
18 of this approach, for instance, modelling the active drug  
19 subnetworks using deep learning, could be applied to  
20 systematically predict combinations and side-effects for  
21 precision medicine applications in complex diseases<sup>40,45</sup>.

## 22 **Conclusion**

23 This study generated two main outputs: (i) proposed a data-  
24 driven framework for elucidating the mechanism of action of

1 pleiotropic natural products using transcriptome data and  
2 protein interactome and (ii) demonstrated that plant-derived  
3 drugs (actein, indole-3-carbinol, withaferin A and CKI) are  
4 capable of simultaneously regulating multiple carcinogenesis  
5 processes in breast cancer. Thus, network-centric methods can  
6 extract subtle systemic drug effects on cellular pathways and  
7 provides a better approach to the abortive exquisite ‘target’  
8 approach in studying poly-pharmacologic compounds.  
9 Although breast cancer dataset was used to prove the concept,  
10 the approach can also be applied on other cancers. We  
11 anticipate that the proposed framework will be instrumental in  
12 accelerating evaluation of poly-pharmacologic compounds for  
13 applications in oncology precision medicine and other complex  
14 diseases.

15

## 16 **References**

- 17 1. Hopkins, A. L. Network pharmacology: the next  
18 paradigm in drug discovery. *Nat. Chem. Biol.* **4**, 682–  
19 690 (2008).
- 20 2. Boran, A. D. W. & Iyengar, R. Systems pharmacology.  
21 *Mt. Sinai J. Med.* **77**, 333–44 (2010).
- 22 3. Erler, J. T. & Linding, R. Network medicine strikes a  
23 blow against breast cancer. *Cell* **149**, 731–3 (2012).
- 24 4. Barabási, A.-L., Gulbahce, N. & Loscalzo, J. Network

- 1            Medicine: A Network-based Approach to Human  
2            Disease. *Nat. Rev. Genet.* **12**, 56 (2011).
- 3    5.        Rosen, L. S., Ashurst, H. L. & Chap, L. Targeting signal  
4            transduction pathways in metastatic breast cancer: a  
5            comprehensive review. *Oncologist* **15**, 216–35 (2010).
- 6    6.        Waks, A. G. & Winer, E. P. Breast Cancer Treatment.  
7            *JAMA* **321**, 288 (2019).
- 8    7.        Greenwell, M. & Rahman, P. K. S. M. Medicinal Plants:  
9            Their Use in Anticancer Treatment. *Int. J. Pharm. Sci.*  
10           *Res.* **6**, 4103–4112 (2015).
- 11   8.        Barabási, A.-L. & Oltvai, Z. N. Network biology:  
12            understanding the cell's functional organization. *Nat.*  
13            *Rev. Genet.* **5**, 101–113 (2004).
- 14   9.        Mitra, K., Carvunis, A.-R., Ramesh, S. K. & Ideker, T.  
15            Integrative approaches for finding modular structure in  
16            biological networks. *Nat. Rev. Genet.* **14**, 719–732  
17            (2013).
- 18   10.        Batra, R. *et al.* On the performance of de novo pathway  
19            enrichment. *npj Syst. Biol. Appl.* **3**, 6 (2017).
- 20   11.        Cursons, J. *et al.* Stimulus-dependent differences in  
21            signalling regulate epithelial-mesenchymal plasticity and  
22            change the effects of drugs in breast cancer cell lines.  
23            *Cell Commun. Signal.* **13**, 26 (2015).
- 24   12.        Engelmann, J. C. *et al.* Causal Modeling of Cancer-

- 1           Stromal Communication Identifies PAPP A as a Novel  
2           Stroma-Secreted Factor Activating NF $\kappa$ B Signaling in  
3           Hepatocellular Carcinoma. *PLoS Comput. Biol.* **11**,  
4           e1004293 (2015).
- 5   13.   Yan, H. *et al.* Aberrant expression of cell cycle and  
6           material metabolism related genes contributes to  
7           hepatocellular carcinoma occurrence. *Pathol. - Res.*  
8           *Pract.* **213**, 316–321 (2017).
- 9   14.   AbdulHameed, M. D. M. *et al.* Systems Level Analysis  
10          and Identification of Pathways and Networks Associated  
11          with Liver Fibrosis. *PLoS One* **9**, e112193 (2014).
- 12   15.   Cantone, M. *et al.* A gene regulatory architecture that  
13          controls region-independent dynamics of  
14          oligodendrocyte differentiation. *Glia* **67**, 825–843  
15          (2019).
- 16   16.   Einbond, L. S. *et al.* The growth inhibitory effect of  
17          actein on human breast cancer cells is associated with  
18          activation of stress response pathways. *Int. J. Cancer*  
19          **121**, 2073–2083 (2007).
- 20   17.   Qu, Z. *et al.* Identification of candidate anti-cancer  
21          molecular mechanisms of Compound Kushen Injection  
22          using functional genomics. *Oncotarget* **7**, 66003–66019  
23          (2016).
- 24   18.   Caruso, J. A. *et al.* Indole-3-carbinol and its N-alkoxy

- 1 derivatives preferentially target ER  $\alpha$  -positive breast  
2 cancer cells. *Cell Cycle* **13**, 2587–2599 (2014).
- 3 19. Szarek and Szic, K. *et al.* Pharmacological Levels of  
4 Withaferin A (*Withania somnifera*) Trigger Clinically  
5 Relevant Anticancer Effects Specific to Triple Negative  
6 Breast Cancer Cells. *PLoS One* **9**, e87850 (2014).
- 7 20. Ritchie, M. E. *et al.* limma powers differential  
8 expression analyses for RNA-sequencing and microarray  
9 studies. *Nucleic Acids Res.* **43**, e47–e47 (2015).
- 10 21. Alcaraz, N. *et al.* Efficient key pathway mining:  
11 combining networks and OMICS data. *Integr. Biol.* **4**,  
12 756–764 (2012).
- 13 22. Oughtred, R. *et al.* The BioGRID interaction database:  
14 2019 update. *Nucleic Acids Res.* **47**, D529–D541.
- 15 23. Tang, Y., Li, M., Wang, J., Pan, Y. & Wu, F.-X.  
16 CytoNCA: A cytoscape plugin for centrality analysis and  
17 evaluation of protein interaction networks. *Biosystems*  
18 **127**, 67–72 (2015).
- 19 24. Chen, X., Miao, Z., Divate, M., Zhao, Z. & Cheung, E.  
20 KM-express: an integrated online patient survival and  
21 gene expression analysis tool for the identification and  
22 functional characterization of prognostic markers in  
23 breast and prostate cancers. *Database (Oxford)*. **2018**,  
24 (2018).

- 1 25. Kuleshov, M. V *et al.* Enrichr: a comprehensive gene set  
2 enrichment analysis web server 2016 update. *Nucleic*  
3 *Acids Res.* **44**, W90-7 (2016).
- 4 26. Liu, K.-Q., Liu, Z.-P., Hao, J.-K., Chen, L. & Zhao, X.-  
5 M. Identifying dysregulated pathways in cancers from  
6 pathway interaction networks. *BMC Bioinformatics* **13**,  
7 126 (2012).
- 8 27. Wang, Q., Shi, C.-J. & Lv, S.-H. Benchmarking pathway  
9 interaction network for colorectal cancer to identify  
10 dysregulated pathways. *Brazilian J. Med. Biol. Res. =*  
11 *Rev. Bras. Pesqui. medicas e Biol.* **50**, e5981 (2017).
- 12 28. Ju, W., Li, J., Yu, W. & Zhang, R. iGraph: an  
13 incremental data processing system for dynamic graph.  
14 *Front. Comput. Sci.* **10**, 462–476 (2016).
- 15 29. Sanchez-Vega, F. *et al.* Oncogenic Signaling Pathways  
16 in The Cancer Genome Atlas. *Cell* **173**, 321-337.e10  
17 (2018).
- 18 30. Desmedt, C. *et al.* Biological Processes Associated with  
19 Breast Cancer Clinical Outcome Depend on the  
20 Molecular Subtypes. *Clin. Cancer Res.* **14**, 5158–5165  
21 (2008).
- 22 31. Dai, X., Cheng, H., Bai, Z. & Li, J. Breast Cancer Cell  
23 Line Classification and Its Relevance with Breast Tumor  
24 Subtyping. *J. Cancer* **8**, 3131–3141 (2017).

- 1 32. Alcaraz, N., Küçük, H., Weile, J., Wipat, A. &  
2 Baumbach, J. KeyPathwayMiner: Detecting Case-  
3 Specific Biological Pathways Using Expression Data.  
4 *Internet Math.* **7**, 299–313 (2011).
- 5 33. Beisser, D., Klau, G. W., Dandekar, T., Muller, T. &  
6 Dittrich, M. T. BioNet: an R-Package for the functional  
7 analysis of biological networks. *Bioinformatics* **26**,  
8 1129–1130 (2010).
- 9 34. van der Greef, J. & McBurney, R. N. Rescuing drug  
10 discovery: in vivo systems pathology and systems  
11 pharmacology. *Nat. Rev. Drug Discov.* **4**, 961–967  
12 (2005).
- 13 35. Chen, G.-Q. *et al.* Halofuginone inhibits colorectal  
14 cancer growth through suppression of Akt/mTORC1  
15 signaling and glucose metabolism. *Oncotarget* **6**, 24148–  
16 62 (2015).
- 17 36. Wozniak, J. & Ludwig, A. Novel role of APP cleavage  
18 by ADAM10 for breast cancer metastasis. *EBioMedicine*  
19 **38**, 5–6 (2018).
- 20 37. Walsh, L. A. *et al.* An Integrated Systems Biology  
21 Approach Identifies TRIM25 as a Key Determinant of  
22 Breast Cancer Metastasis. *Cell Rep.* **20**, 1623–1640  
23 (2017).
- 24 38. Wang, J. *et al.* Multiple functions of the RNA-binding



- 1 protein HuR in cancer progression, treatment responses  
2 and prognosis. *Int. J. Mol. Sci.* **14**, 10015–41 (2013).
- 3 39. Maguire, P. *et al.* Estrogen receptor beta (ESR2)  
4 polymorphisms in familial and sporadic breast cancer.  
5 *Breast Cancer Res. Treat.* **94**, 145–152 (2005).
- 6 40. Costa, J. Systems medicine in oncology. *Nat. Clin.*  
7 *Pract. Oncol.* **5**, 117–117 (2008).
- 8 41. Levitsky, D. O. & Dembitsky, V. M. Anti-breast Cancer  
9 Agents Derived from Plants. *Nat. Products Bioprospect.*  
10 **5**, 1 (2014).
- 11 42. Chen, Y.-A. *et al.* Integrated Pathway Clusters with  
12 Coherent Biological Themes for Target Prioritisation.  
13 *PLoS One* **9**, e99030 (2014).
- 14 43. Wajant, H. The Role of TNF in Cancer. in *Results and*  
15 *problems in cell differentiation* vol. 49 1–15 (2009).
- 16 44. Boutet, E. *et al.* UniProtKB/Swiss-Prot, the Manually  
17 Annotated Section of the UniProt KnowledgeBase: How  
18 to Use the Entry View. in 23–54 (Humana Press, New  
19 York, NY, 2016). doi:10.1007/978-1-4939-3167-5\_2.
- 20 45. van Hasselt, J. G. C. & Iyengar, R. Systems  
21 Pharmacology: Defining the Interactions of Drug  
22 Combinations. *Annu. Rev. Pharmacol. Toxicol.* **59**, 21–  
23 40 (2019).
- 24 46. Zhang, G.-B., Li, Q.-Y., Chen, Q.-L. & Su, S.-B.

- 1 Network pharmacology: a new approach for chinese  
2 herbal medicine research. *Evid. Based. Complement.*  
3 *Alternat. Med.* **2013**, 621423 (2013).
- 4 47. Yue, G. G.-L. *et al.* New potential beneficial effects of  
5 actein, a triterpene glycoside isolated from *Cimicifuga*  
6 species, in breast cancer treatment. *Sci. Rep.* **6**, 35263  
7 (2016).
- 8 48. Ji, L. *et al.* Actein induces autophagy and apoptosis in  
9 human bladder cancer by potentiating ROS/JNK and  
10 inhibiting AKT pathways. *Oncotarget* **8**, 112498–  
11 112515 (2017).
- 12 49. Wu, X.-X. *et al.* Actein Inhibits the Proliferation and  
13 Adhesion of Human Breast Cancer Cells and Suppresses  
14 Migration in vivo. *Front. Pharmacol.* **9**, 1466 (2018).
- 15 50. Zhang, Y., Lian, J. & Wang, X. Actein inhibits cell  
16 proliferation and migration and promotes cell apoptosis  
17 in human non-small cell lung cancer cells. *Oncol. Lett.*  
18 **15**, 3155–3160 (2018).
- 19 51. Yu, L., Zhou, Y., Yang, Y., Lu, F. & Fan, Y. Efficacy  
20 and Safety of Compound Kushen Injection on Patients  
21 with Advanced Colon Cancer: A Meta-Analysis of  
22 Randomized Controlled Trials. *Evid. Based.*  
23 *Complement. Alternat. Med.* **2017**, 7102514 (2017).
- 24 52. Nourmohammadi, S. *et al.* Effect of Compound Kushen

- 1 Injection, a Natural Compound Mixture, and Its  
2 Identified Chemical Components on Migration and  
3 Invasion of Colon, Brain, and Breast Cancer Cell Lines.  
4 *Front. Oncol.* **9**, 314 (2019).
- 5 53. Gao, L. *et al.* Uncovering the anticancer mechanism of  
6 Compound Kushen Injection against HCC by integrating  
7 quantitative analysis, network analysis and experimental  
8 validation. *Sci. Rep.* **8**, 624 (2018).
- 9 54. Weng, J.-R., Tsai, C.-H., Kulp, S. K. & Chen, C.-S.  
10 Indole-3-carbinol as a chemopreventive and anti-cancer  
11 agent. *Cancer Lett.* **262**, 153–63 (2008).
- 12 55. Katz, E., Nisani, S. & Chamovitz, D. A. Indole-3-  
13 carbinol: a plant hormone combatting cancer.  
14 *F1000Research* **7**, (2018).
- 15 56. Chavez, K. J., Garimella, S. V & Lipkowitz, S. Triple  
16 negative breast cancer cell lines: one tool in the search  
17 for better treatment of triple negative breast cancer.  
18 *Breast Dis.* **32**, 35–48 (2010).
- 19 57. Choi, M. J., Park, E. J., Min, K. J., Park, J.-W. & Kwon,  
20 T. K. Endoplasmic reticulum stress mediates withaferin  
21 A-induced apoptosis in human renal carcinoma cells.  
22 *Toxicol. Vitro.* **25**, 692–698 (2011).
- 23 58. Ghosh, K., De, S., Das, S., Mukherjee, S. & Sengupta  
24 Bandyopadhyay, S. Withaferin A Induces ROS-

- 1 Mediated Paraptosis in Human Breast Cancer Cell-Lines  
2 MCF-7 and MDA-MB-231. *PLoS One* **11**, e0168488  
3 (2016).
- 4 59. Hassannia, B. *et al.* Nano-targeted induction of dual  
5 ferroptotic mechanisms eradicates high-risk  
6 neuroblastoma. *J. Clin. Invest.* **128**, 3341–3355 (2018).
- 7 60. Sehrawat, A. *et al.* Withaferin A-mediated apoptosis in  
8 breast cancer cells is associated with alterations in  
9 mitochondrial dynamics. *Mitochondrion* (2019)  
10 doi:10.1016/J.MITO.2019.01.003.
- 11 61. Wang, H.-C. *et al.* Different effects of 4 $\beta$ -  
12 hydroxywithanolide E and withaferin A, two  
13 withanolides from Solanaceae plants, on the Akt  
14 signaling pathway in human breast cancer cells.  
15 *Phytomedicine* **53**, 213–222 (2019).
- 16 62. Ghosh, K. *et al.* Withaferin A induced impaired  
17 autophagy and unfolded protein response in human  
18 breast cancer cell-lines MCF-7 and MDA-MB-231.  
19 *Toxicol. Vitro.* **44**, 330–338 (2017).
- 20 63. Hahm, E.-R. *et al.* Withaferin A-Induced Apoptosis in  
21 Human Breast Cancer Cells Is Mediated by Reactive  
22 Oxygen Species. *PLoS One* **6**, e23354 (2011).
- 23 64. Hahm, E.-R. & Singh, S. V. Withaferin A-induced  
24 apoptosis in human breast cancer cells is associated with

- 1 suppression of inhibitor of apoptosis family protein  
2 expression. *Cancer Lett.* **334**, 101–8 (2013).
- 3 65. Chaudhary, K., Poirion, O. B., Lu, L. & Garmire, L. X.  
4 Deep learning–based multi-omics integration robustly  
5 predicts survival in liver cancer. *Clin. Cancer Res.* **24**,  
6 (2018).
- 7 66. Regan-Fendt, K. E. *et al.* Synergy from gene expression  
8 and network mining (SynGeNet) method predicts  
9 synergistic drug combinations for diverse melanoma  
10 genomic subtypes. *npj Syst. Biol. Appl.* **5**, 6 (2019).

11

## 12 **Legends**

## 13 **Figures**

14 **Figure 1:** Computational analysis workflow applied in this  
15 study. The approach is centred on three main analysis sections:  
16 data mining, subnetwork discovery and pathway inference.  
17 PCA: Principal component analysis, FDR: False discovery rate,  
18 FC: Fold change, KPM: KeyPathwayMiner

19 **Figure 2:** Pathway-pathway interaction networks under Actein  
20 (MDA-MB-453 cell line) and Withaferin A (MDA-MB-231  
21 cell line) treatments. The network nodes represent individual  
22 pathways while the coloured clusters represent both pathway  
23 crosstalk and similarity. Pathway-pathway crosstalk (Jaccard  
24 Index)  $\geq 0.25$ .

1 **Supplementary Figures**

2 **Supplementary Figure 1:** Principal component analysis  
3 (PCA) results of transcriptome samples for each dataset  
4 illustrating the distribution of variance in the first two  
5 components considered for sample separation. PC1: principal  
6 component 1, PC2: principal component 2. (a) actein on MDA-  
7 MB-453, (b) CKI on MCF-7, (c) Indole-3-Carbinol on MCF-7,  
8 (d) Indole-3-Carbinol on MDA-MB-231, (e) Indole-3-Carbinol  
9 on MDA-MB-436, (f) Indole-3-Carbinol on T47D, (g) Indole-  
10 3-Carbinol on ZR751, (h) Withaferin A on MCF-7 and (i)  
11 Withaferin A on MDA-MB-231.

12 **Supplementary Figure 2:** Prospective validation plots of most  
13 frequent central genes in the subnetworks. a-e) Overall survival  
14 plots showing bifurcate (APP, ELAVL1 and TRIM25), 75% vs  
15 25% (HNRNPL) and 75% (ESR2) gene expression in relation  
16 to patient overall survival across TCGA breast cancer datasets.  
17 'High' and 'Low' denotes patient cohorts with high median  
18 gene expression over the follow-up period. Logrank (p-value)  
19 < 0.05. f-j) Box-plots showing gene-phenotype (primary,  
20 normal and metastatic) association.

21 **Supplementary Figure 3:** Pathway-pathway interaction  
22 networks based on shared enriched genes illustrating functional  
23 pathway cross-talk. The differently coloured clusters illustrate  
24 highly related pathways terms based on intersecting pathways.  
25 a-g: represents networks of pathways targeted by CKI on MCF-

1 7, I3C on MCF-7, I3C on MDA-MB-436, I3C on T47D, I3C on  
2 ZR751 and WA on MCF-7.

### 3 **Tables**

4 **Table 1:** Summary of topological structure of subnetwork  
5 solutions indicating the number of proteins and their  
6 interactions in each dataset studied. CKI: Compound kushen  
7 injection, I3C: Indole-3-carbinol and WA: Withaferin A

8 **Table 2:** Top 5 genes from the subnetworks for each dataset  
9 based on their betweenness and degree centrality scores. The  
10 genes are labelled using their respective universal identifiers.  
11 ACT: Actein, CKI: Compound kushen injection, I3C: Indole-3-  
12 carbinol, and WA: Withaferin A.

13 **Table 3:** Grouping of targeted canonical oncogenic signaling  
14 pathways based on related cancer pathophysiologic processes.  
15 Three major oncological processes defining the diverse  
16 molecular processes associated with carcinogenesis were used  
17 to deduce biological roles of the various enriched oncological  
18 signaling pathways. The enriched pathways in up-/down-  
19 regulated subnetworks were used to guide the assignment of the  
20 pathways in the up and down categories.

### 21 **Supplementary Tables**

22 **Supplementary Table 1:** Summary of the transcriptome  
23 datasets used and the molecular profiles of the cell lines. The  
24 columns Controls and Treatments list the number of samples in

1 each case. (HER2+: human epidermal receptor 2 positive, LA:  
2 luminal A, TN: triple negative, AC: adenocarcinoma, IDC:  
3 invasive ductal carcinoma, MC: medullary carcinoma, Wt: wild  
4 type, Mut: Mutant, Del: deleted).

5 **Supplementary Table 2:** Summary of the differential  
6 expression analysis results. The number of differentially  
7 expressed genes under the respective plant-derived  
8 drugs/compounds are given in the table. DEG: Differentially  
9 expressed genes, FDR: False discovery rate, FC: Fold change.

10 **Supplementary Table 3:** Results of subnetwork betweenness-  
11 and degree centrality analysis.

12 **Supplementary Table 4:** Pathways enriched in whole  
13 subnetworks. FDR <0.05.

14 **Supplementary Table 5:** Enriched pathways in up- and down-  
15 regulated subnetworks. FDR <0.05.

16 **Supplementary Table 6:** An example of Actein targeted  
17 oncogenesis processes illustrating the approach used in  
18 grouping the oncogenic signaling pathways into different  
19 cancer pathophysiological processes based on the pathways'  
20 enriched genes.

21

22 **Additional Information**

23 **Ethics approval and consent to participate**



1 This work did not require any ethical approval or consent as  
2 only publicly available data were used in this work.

### 3 **Consent for publication**

4 All authors confirm the authenticity of the information  
5 provided and consent to the publication of this manuscript.

### 6 **Data availability**

7 All relevant data are provided together with this manuscript and  
8 any additional data including the R scripts can be supplied upon  
9 request.

### 10 **Conflict of interest**

11 The authors declare no conflict of interest.

### 12 **Funding**

13 No funding was received for this work.

### 14 **Author's contribution**

15 R.O, A.D.Z and T.C conceived the study. R.O performed the  
16 simulations. R.O, A.D.Z and T.C contributed to the scientific  
17 discussion and data interpretation. R.O and T.C wrote the  
18 manuscript. All authors reviewed the manuscript.

### 19 **Acknowledgements**

20 The authors would like to thank the Computational Systems  
21 Biology Laboratory and the team at the Department of  
22 Bioengineering of Gebze Technical University for offering

- 1 useful insights and the computational infrastructure used in this
- 2 work.
- 3
- 4

(a) Actein A on MDA-MB-453

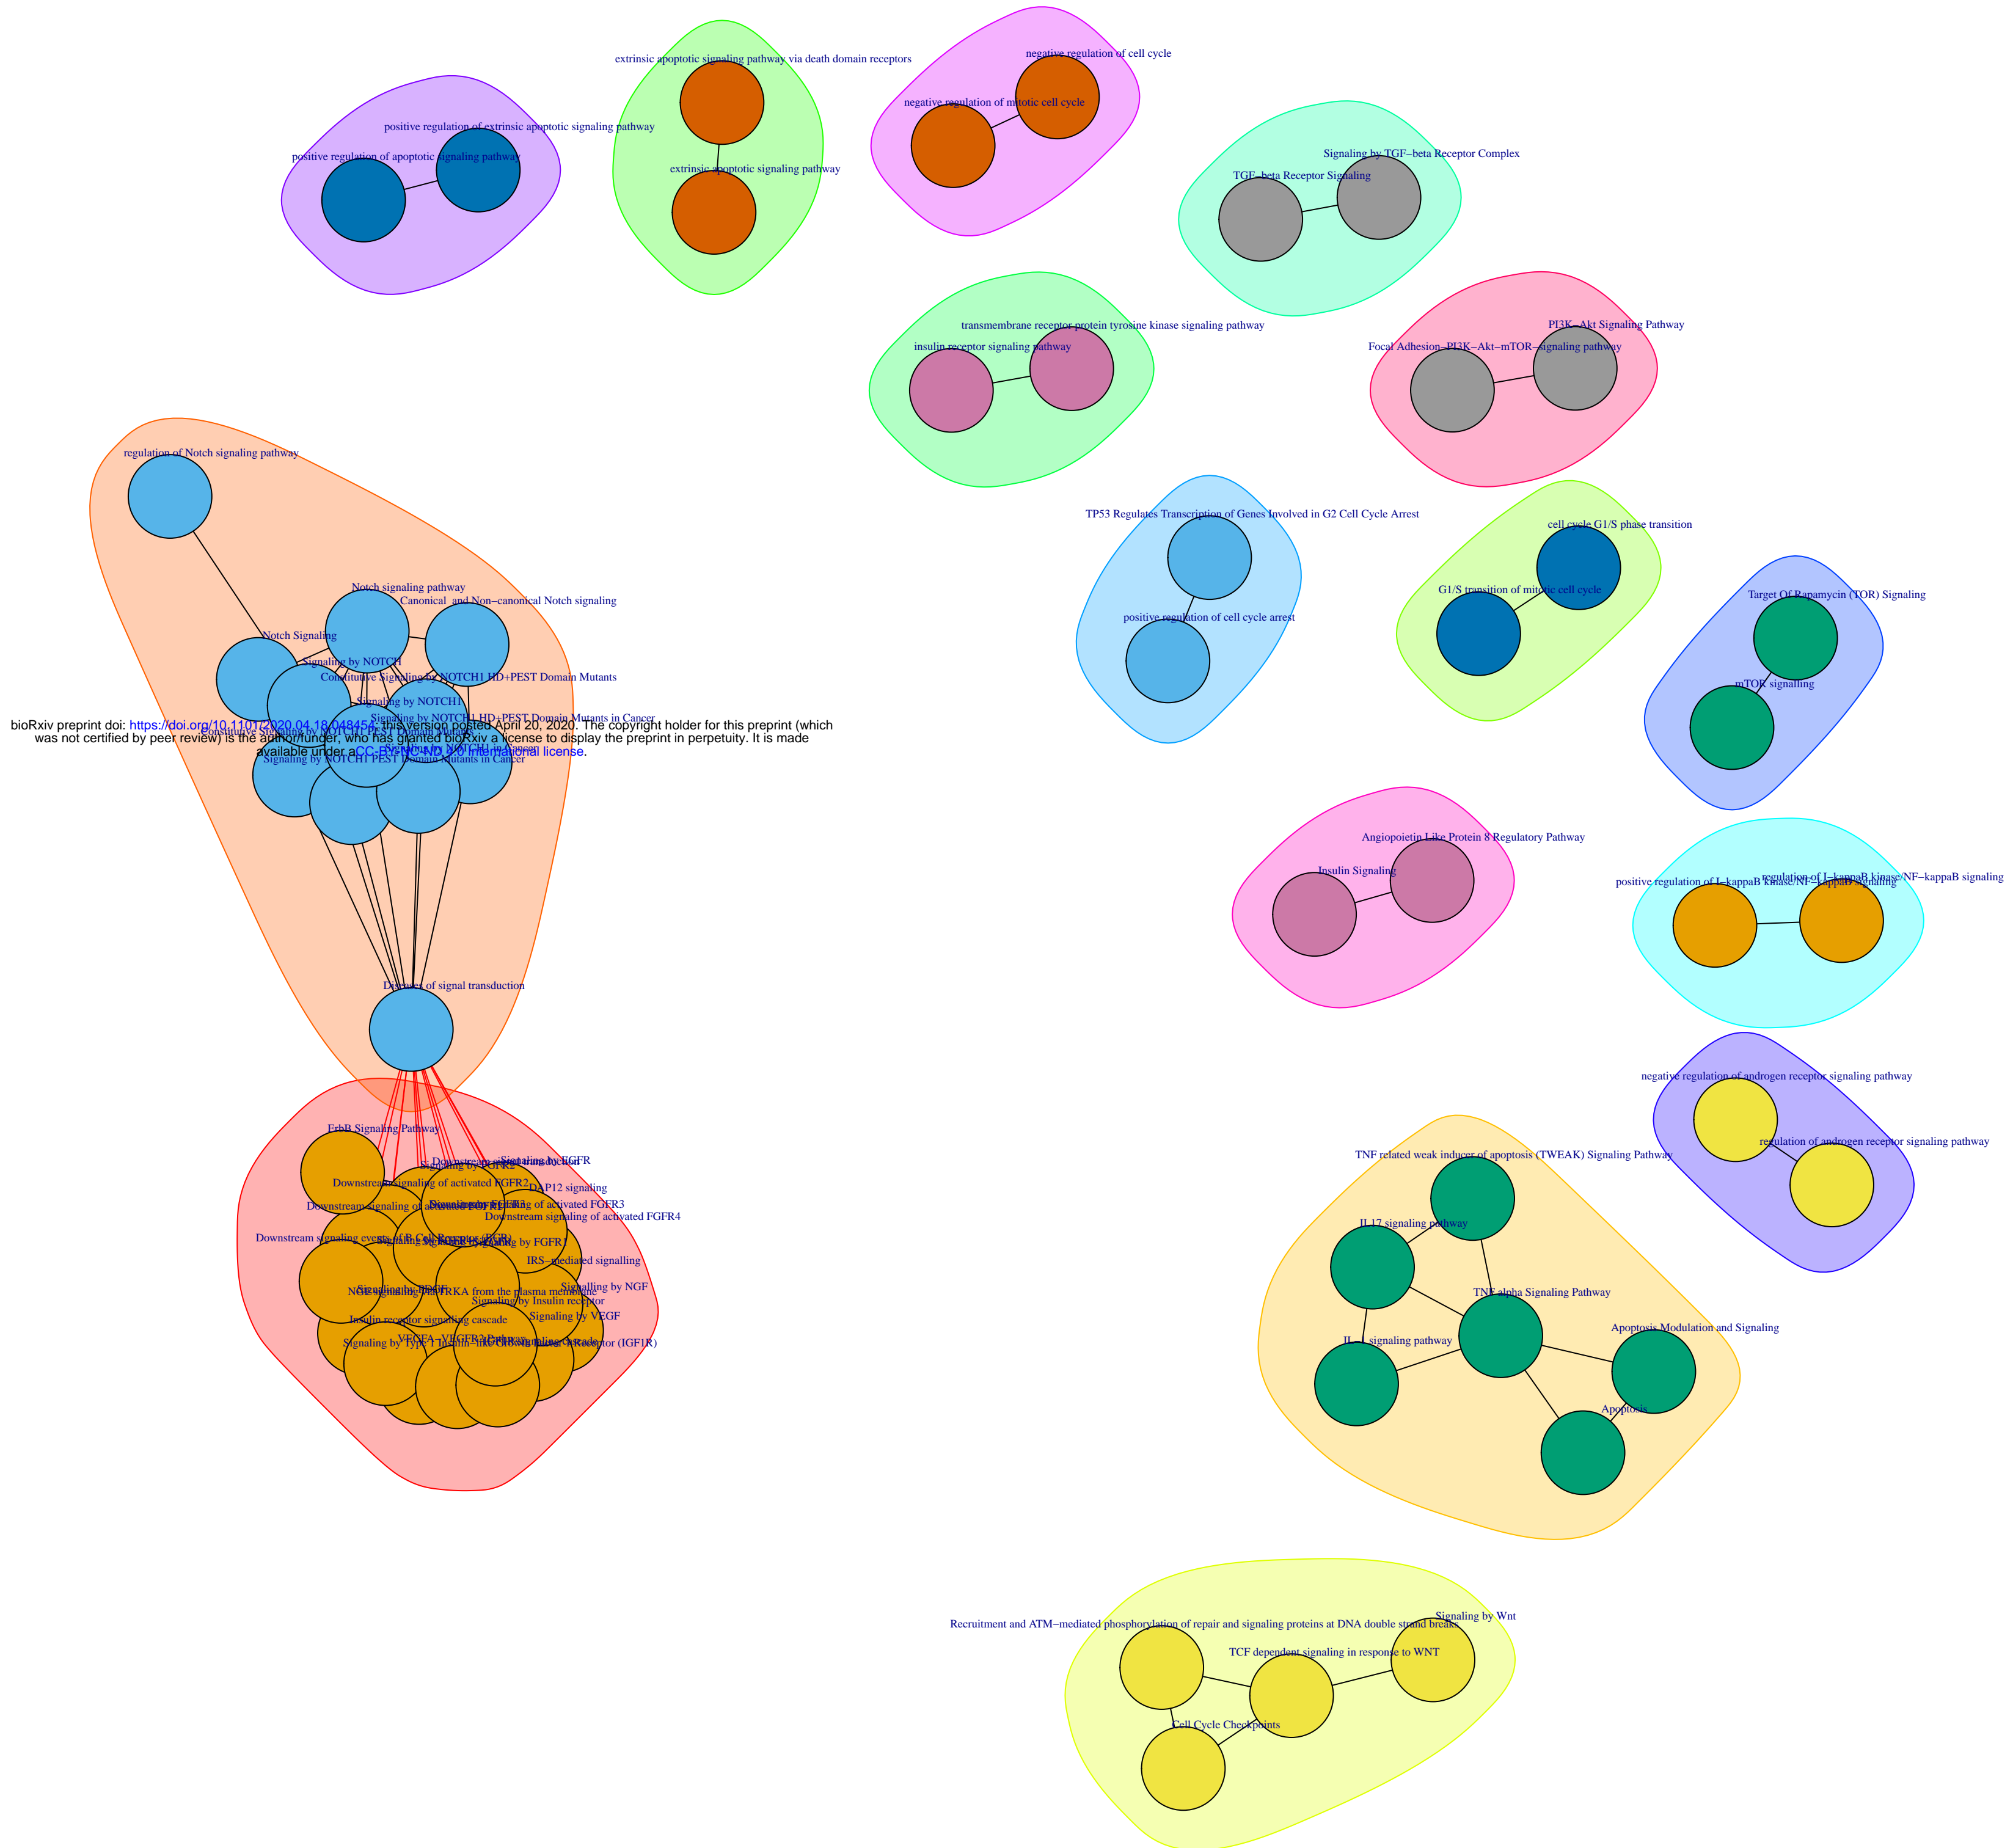

(b) Withaferin A on MDA-MB-231

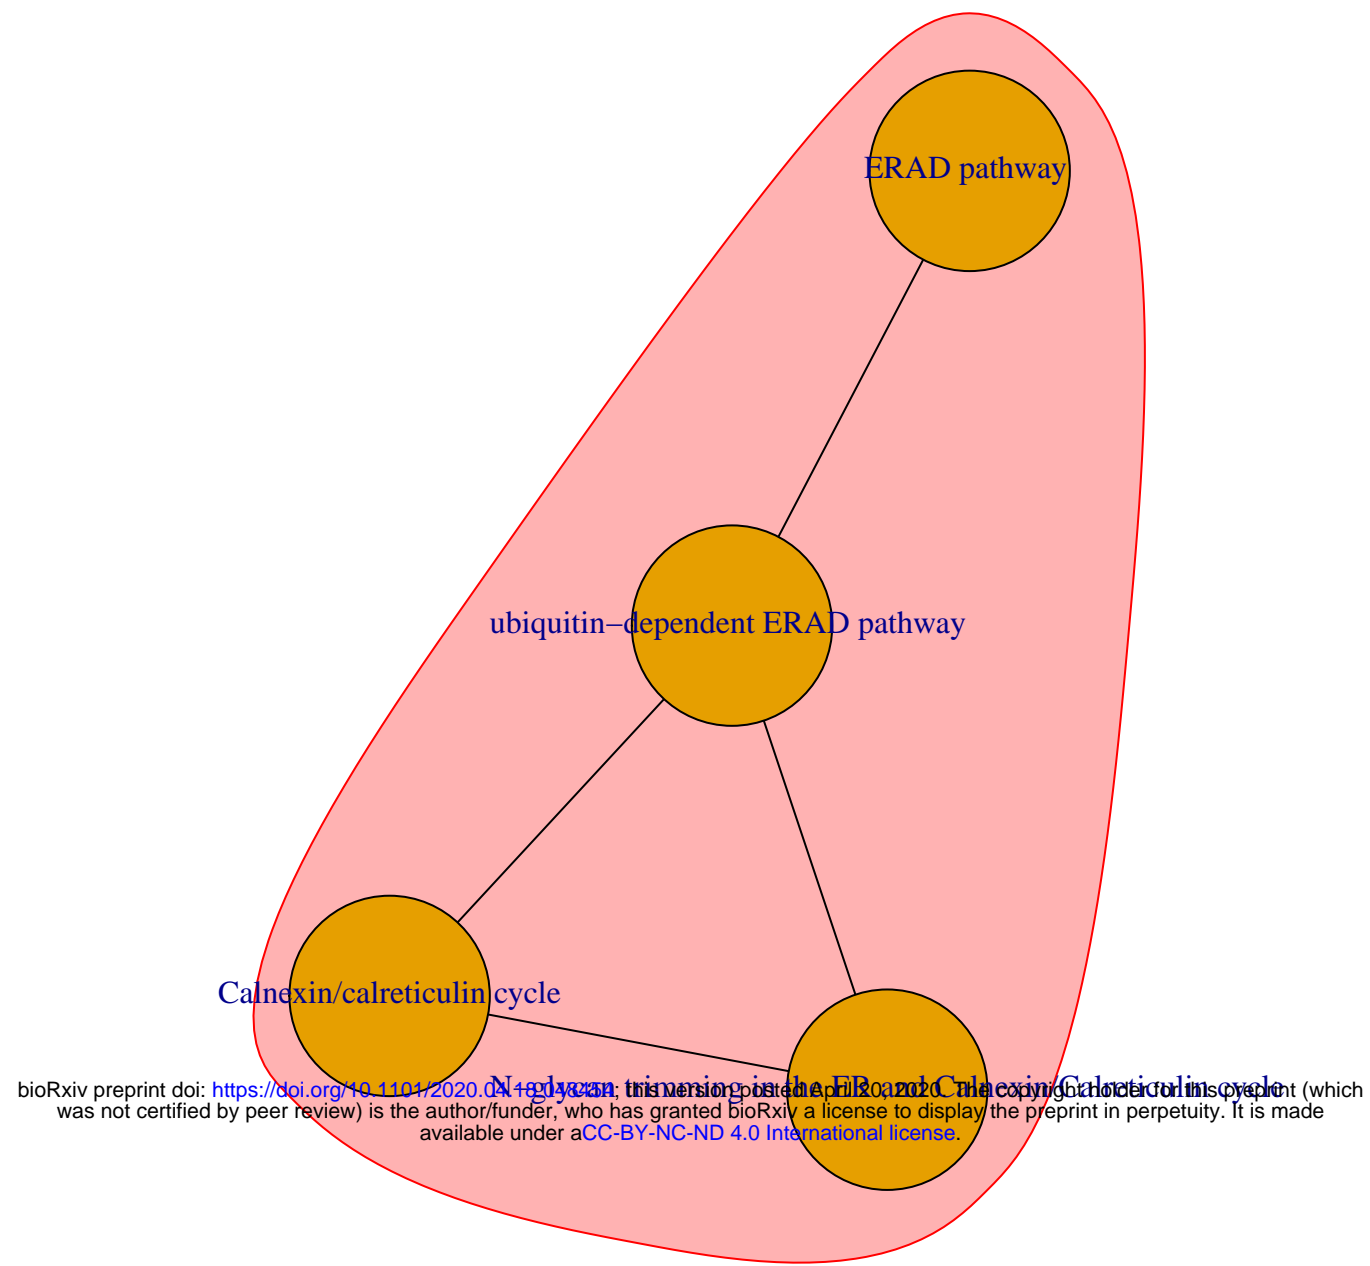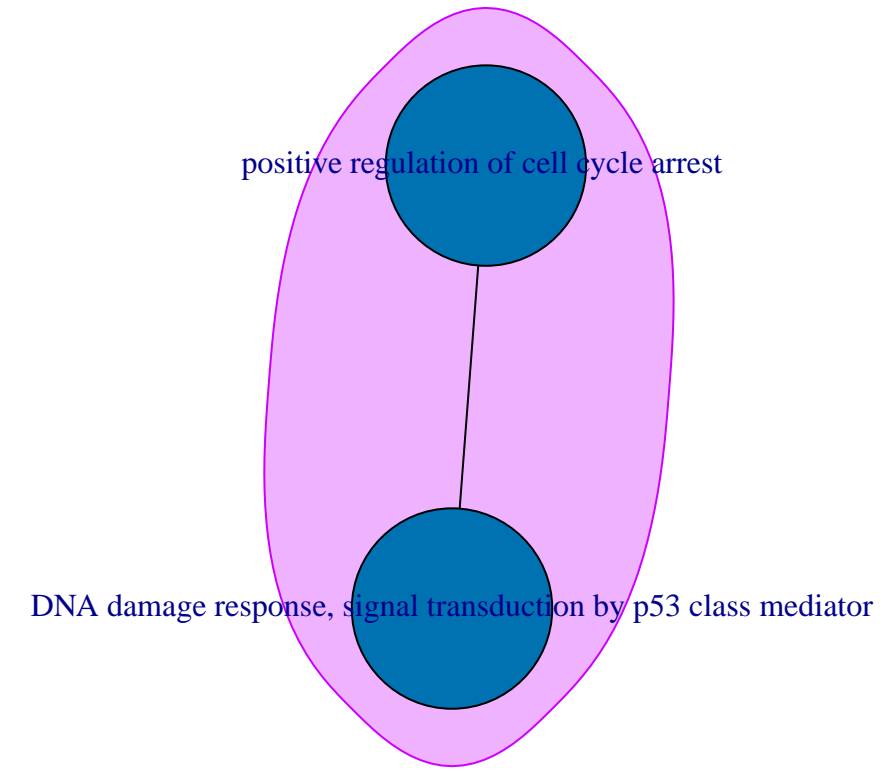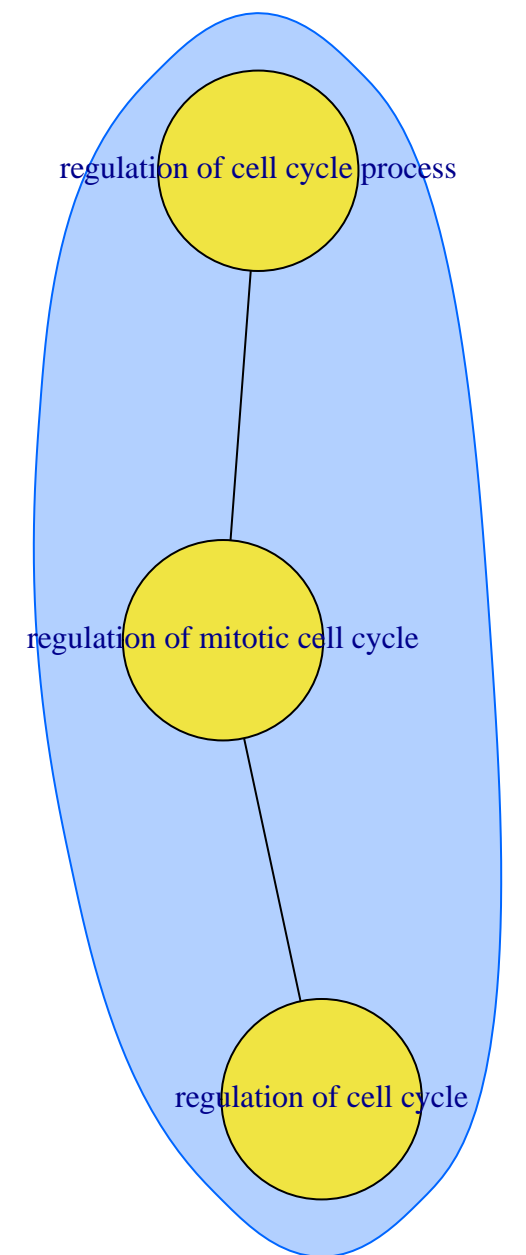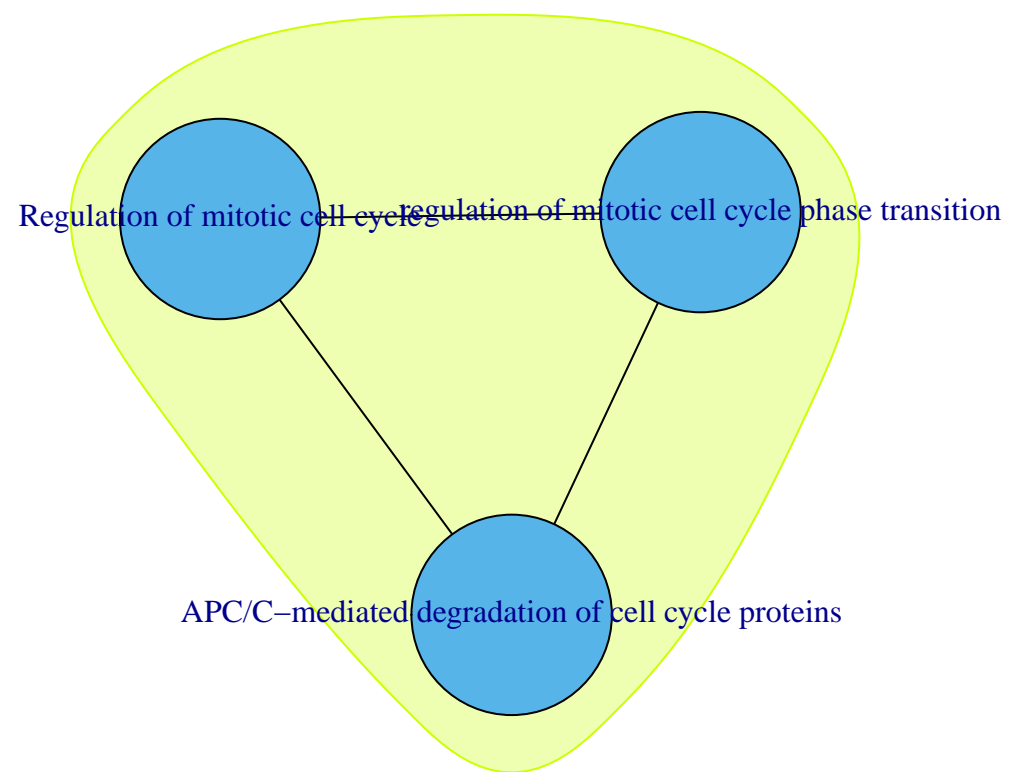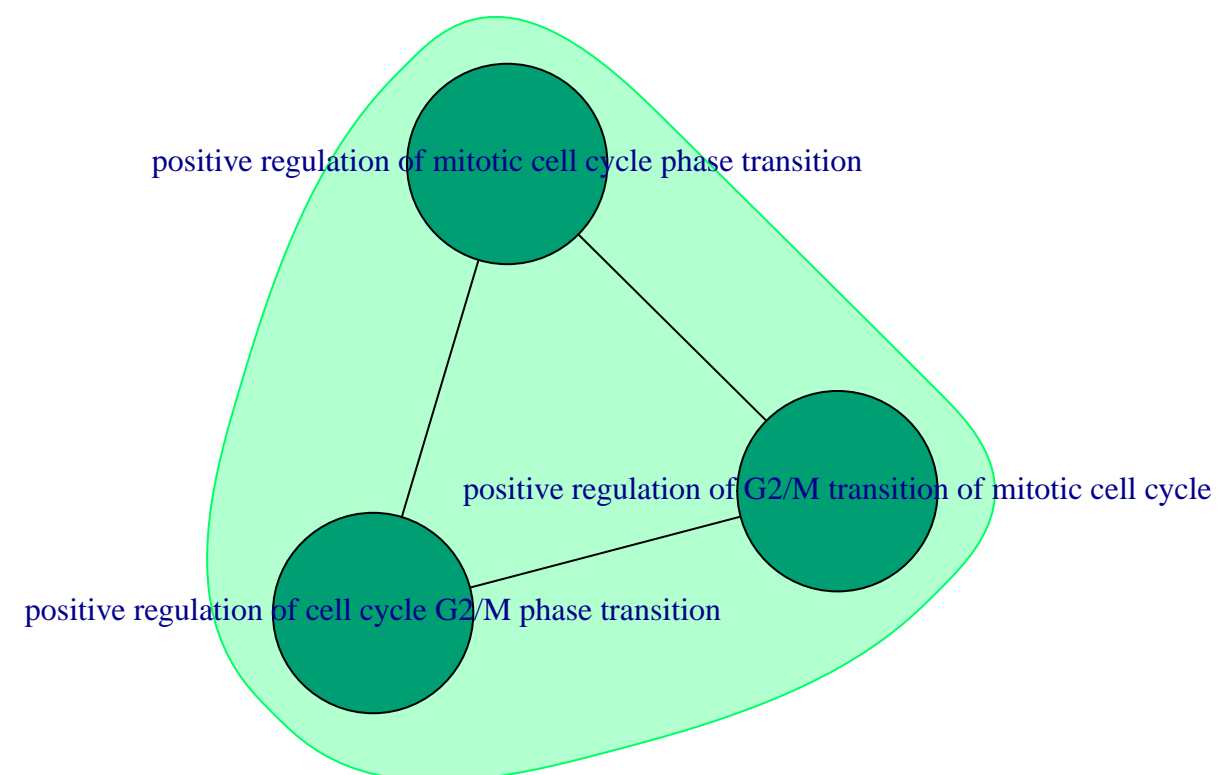

## A Data Mining

1

NCBI-GEO

Database query  
- Plant based  
- Breast cancer  
-  $\geq 3$  samples (control and treatment)

2

PCA  
( $\geq 70\%$  PC)

## B Subnetwork Construction

3

Differential Gene Expression Analysis  
- FDR  
- FC

4

Data Binarization  
FDR < FDR cut-off  
FC > FC cut-off

*Matrix (1,0)*

KPM(Greedy, k=5)  
Mapping and Scoring

5

Drug Targeted Subnetworks

BioGRID  
(PPI)

Human PPIN

## C Pathway Inference

6

Signaling Pathway Enrichment

7

Pathway Similarity Analysis

8

Oncogenesis Process

9

Inference of Drug Molecular Effects

**a)**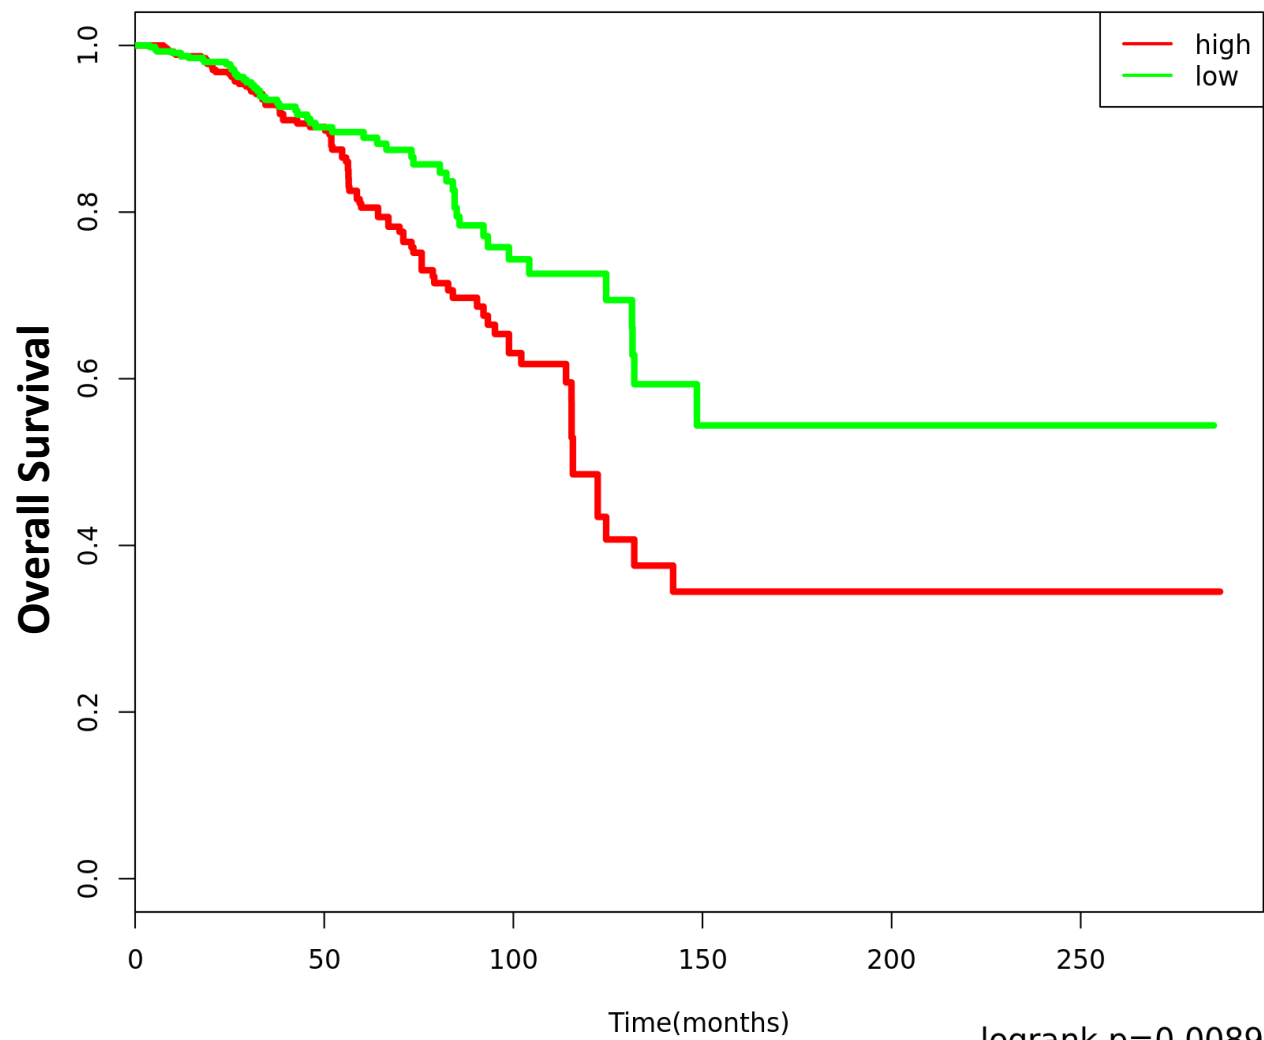

logrank p=0.0089  
Hazard ratio=0.6346  
APP\_ENSG00000142192\_median

**b)**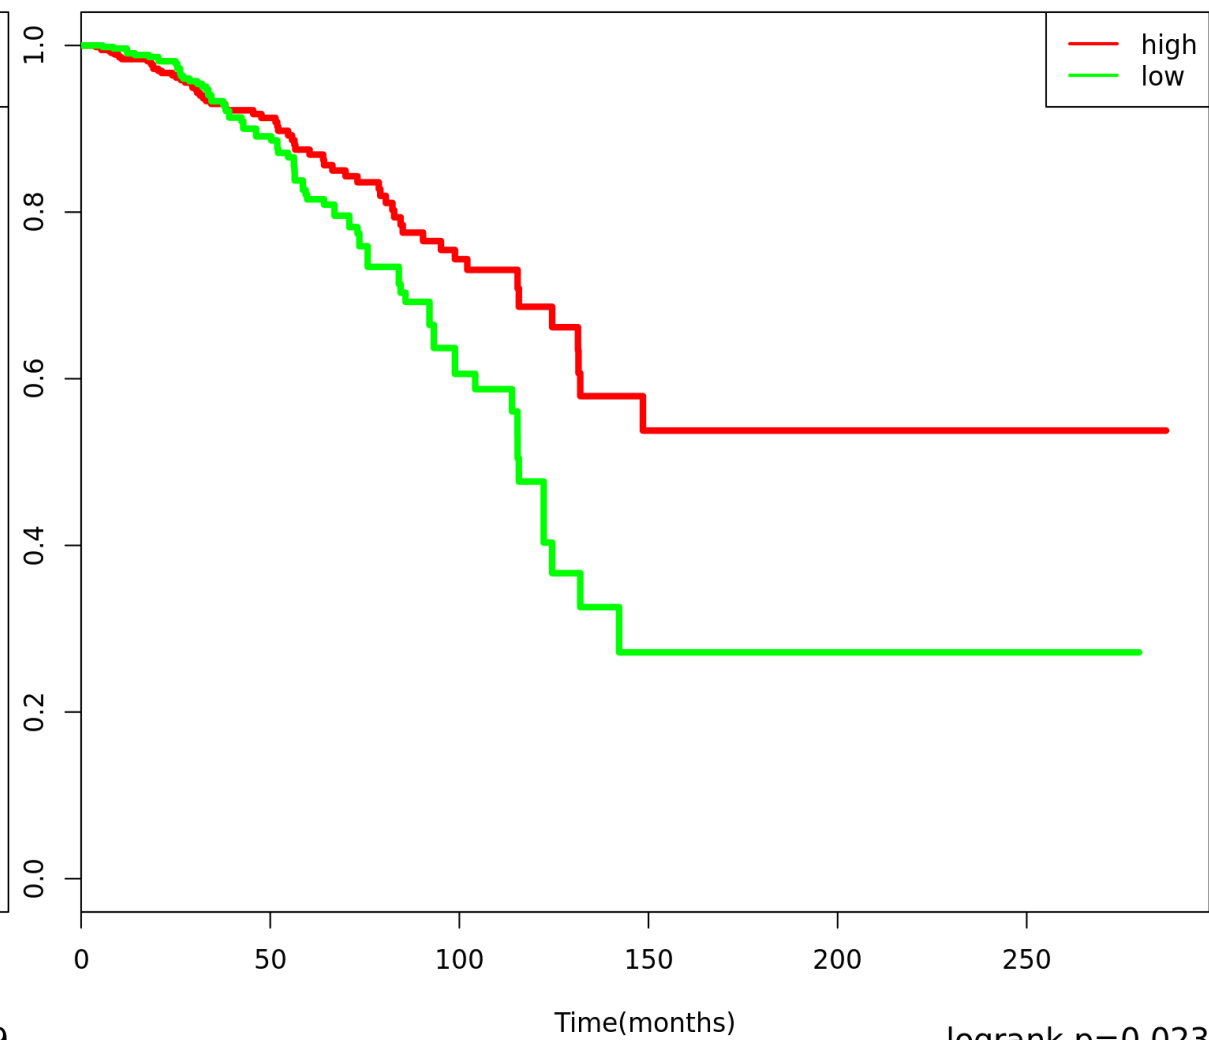

logrank p=0.023  
Hazard ratio=1.4731  
ELAVL1\_ENSG00000066044\_median

c)

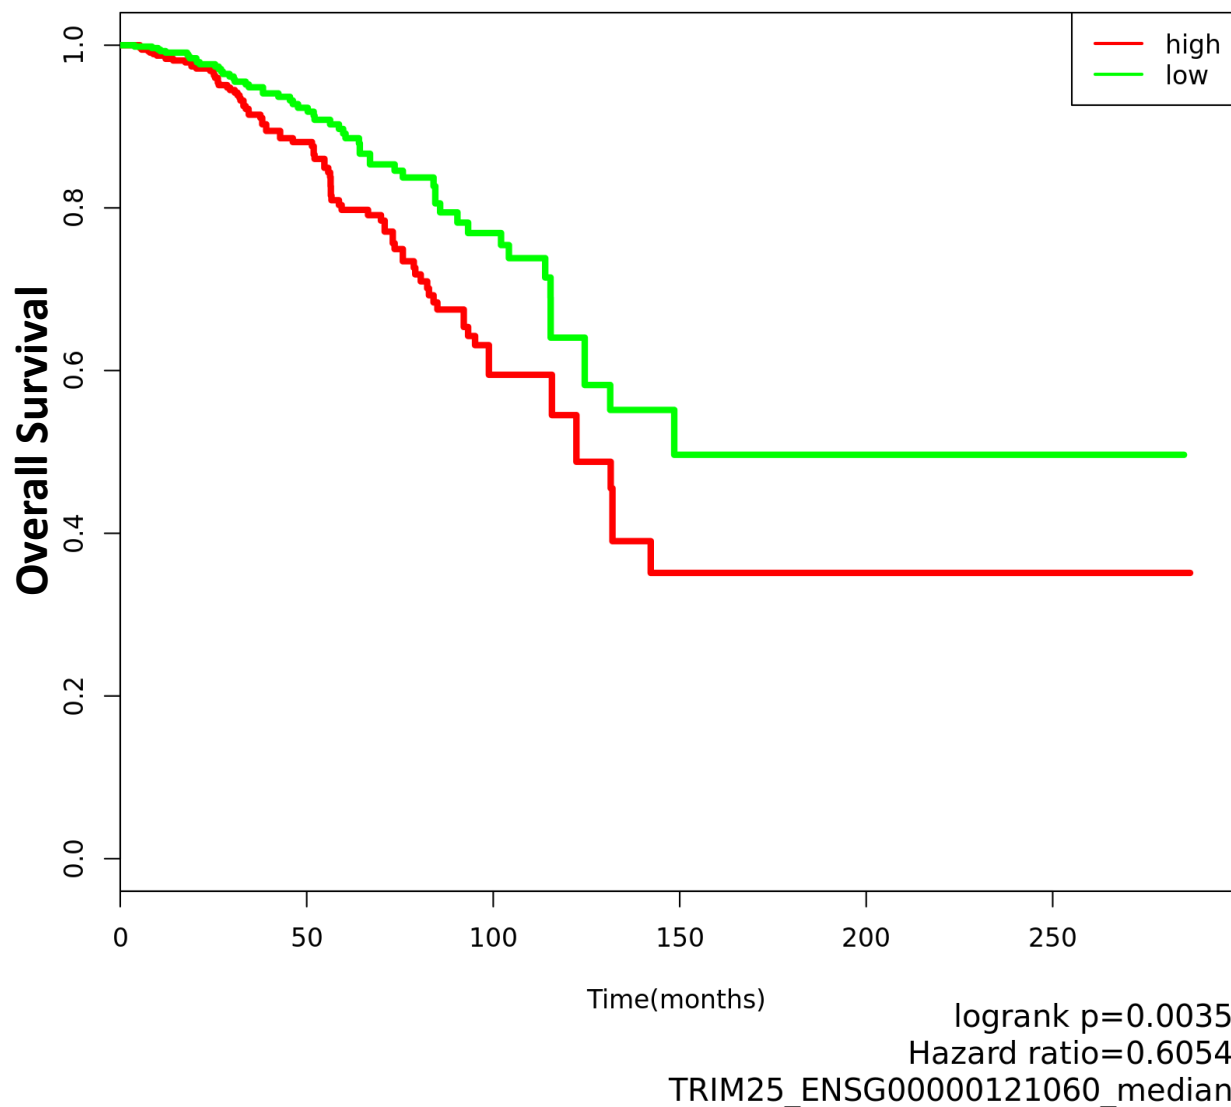

d)

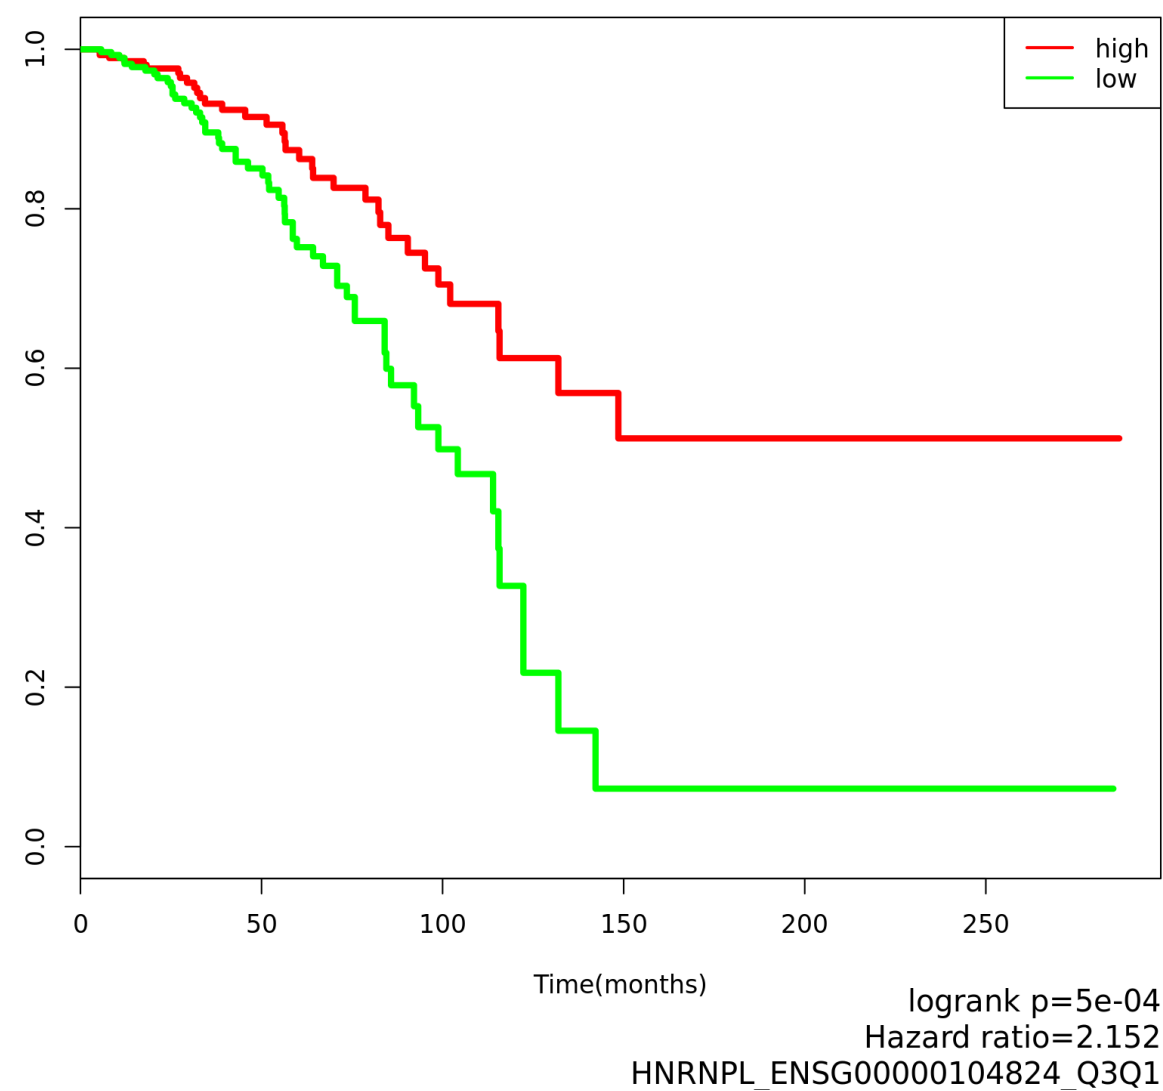

e)

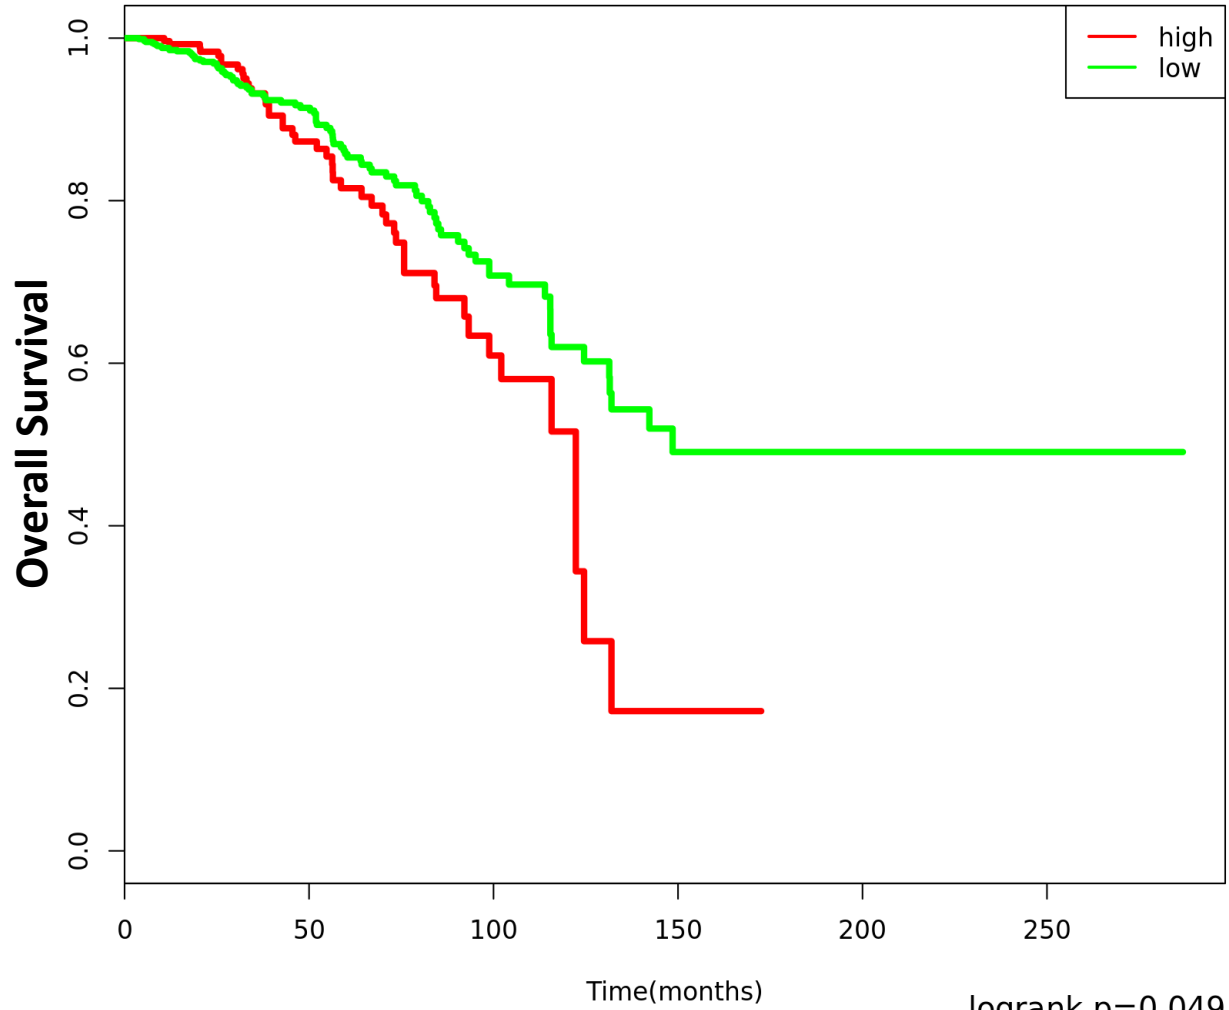

logrank p=0.049  
Hazard ratio=0.7015  
ESR2\_ENSG00000140009\_Q3



f)

**APP expression in Breast\_TCGA**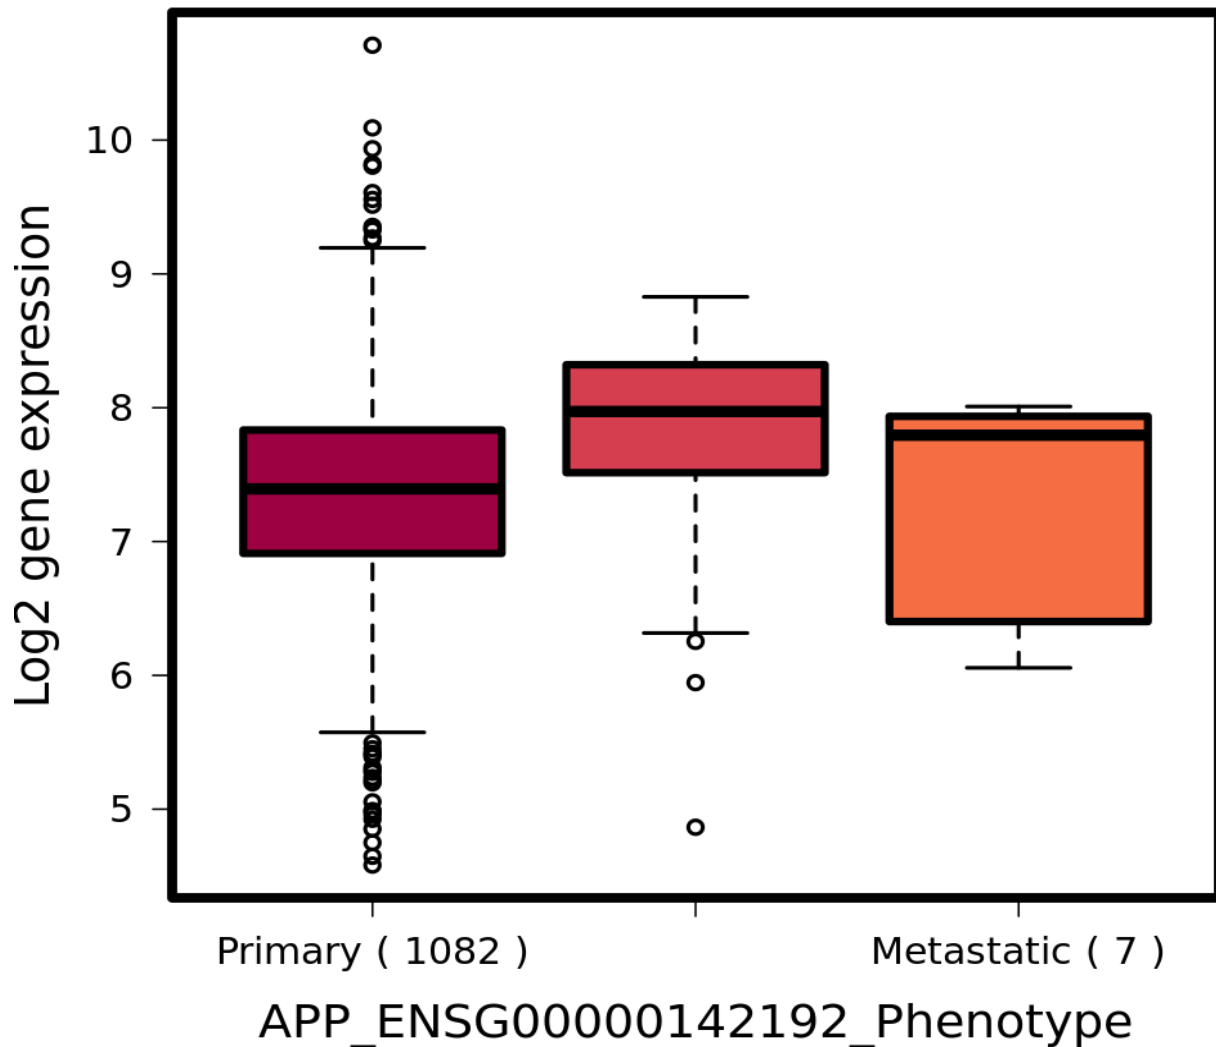

g)

**ELAVL1 expression in Breast\_TCGA**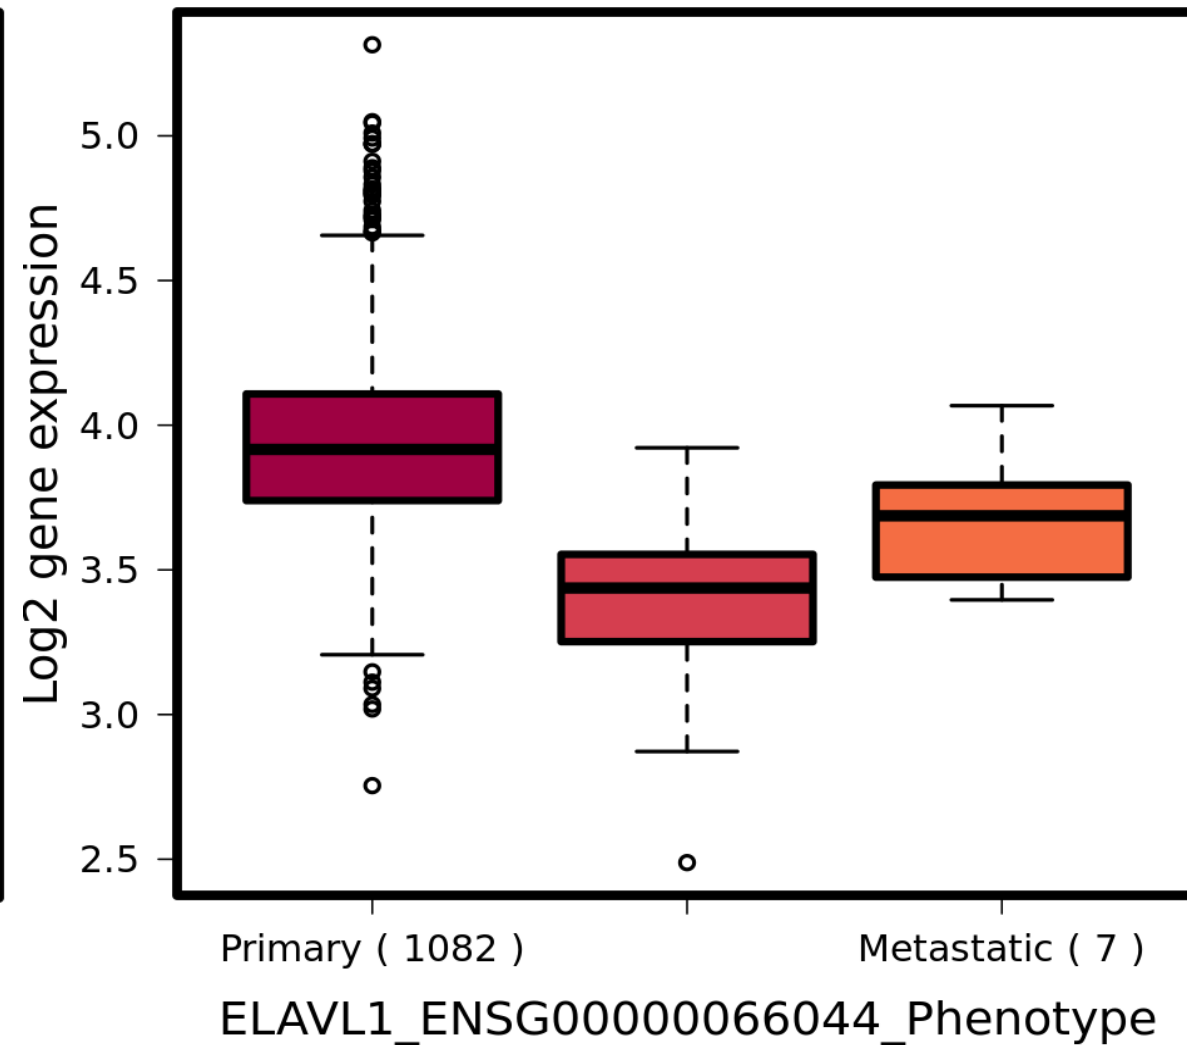

h)

### TRIM25 expression in Breast\_TCGA

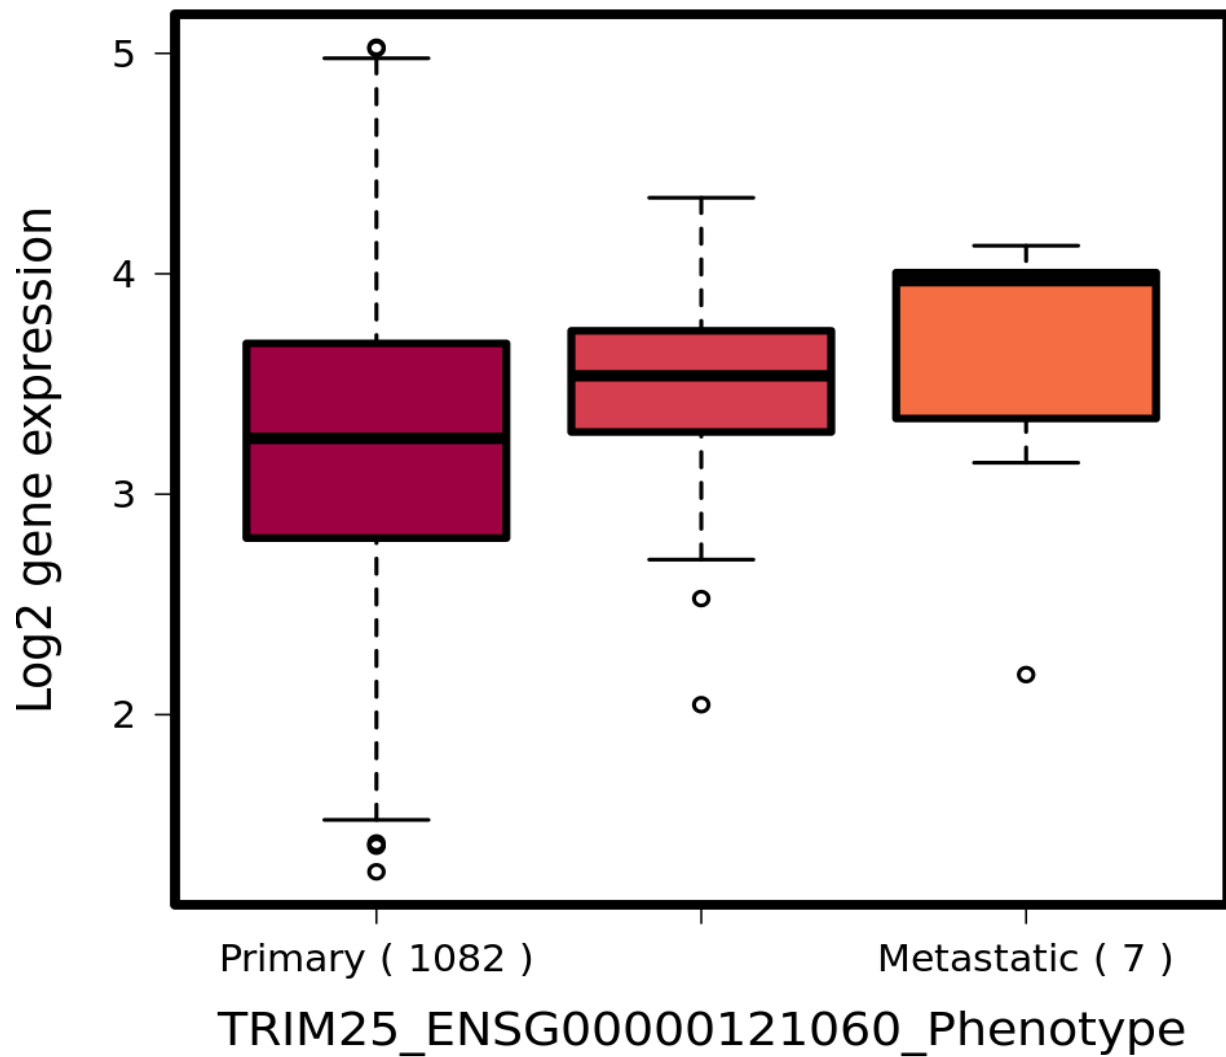

i)

### HNRNPL expression in Breast\_TCGA

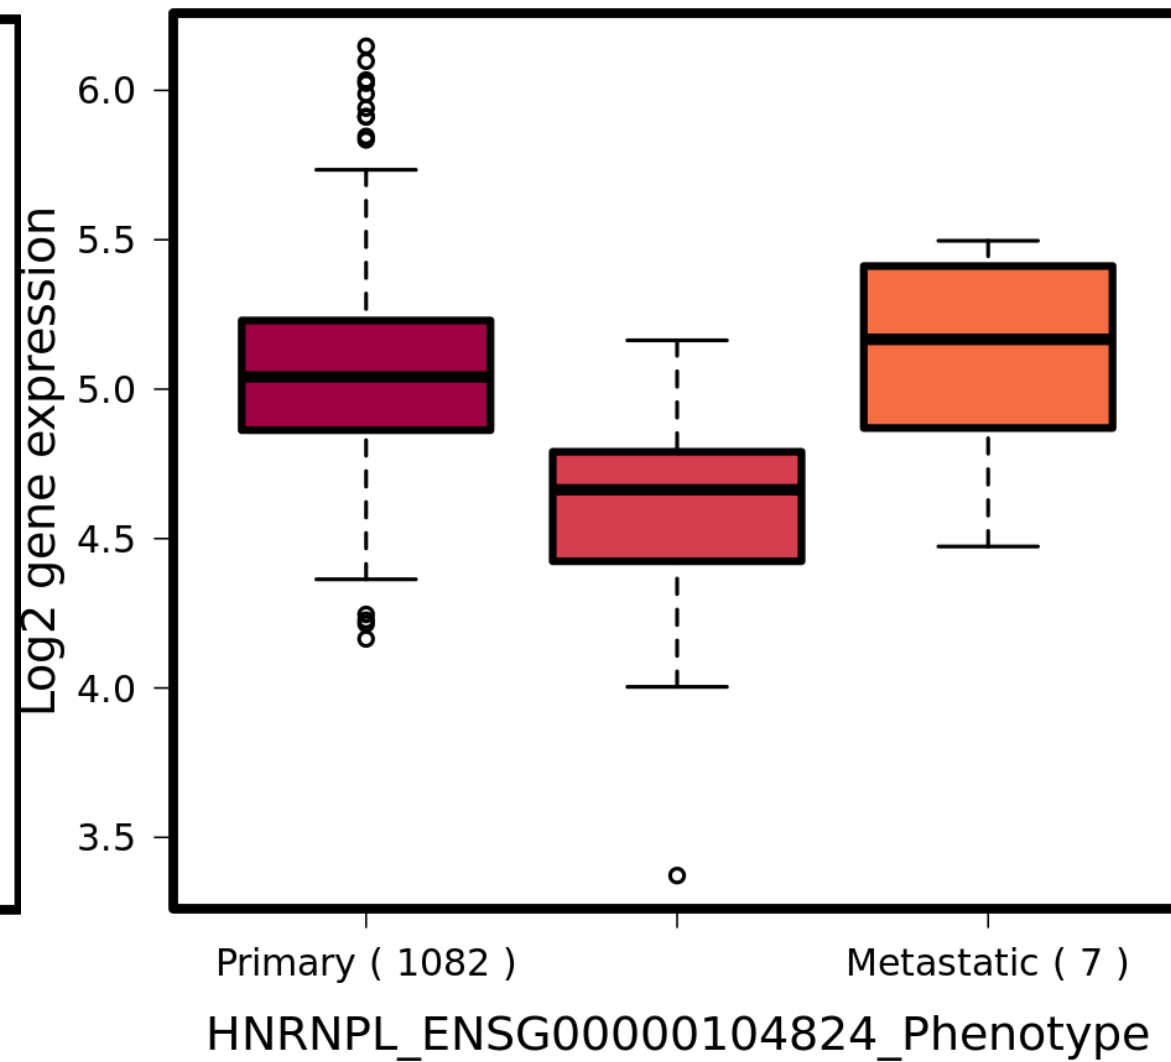

j)

### ESR2 expression in Breast\_TCGA

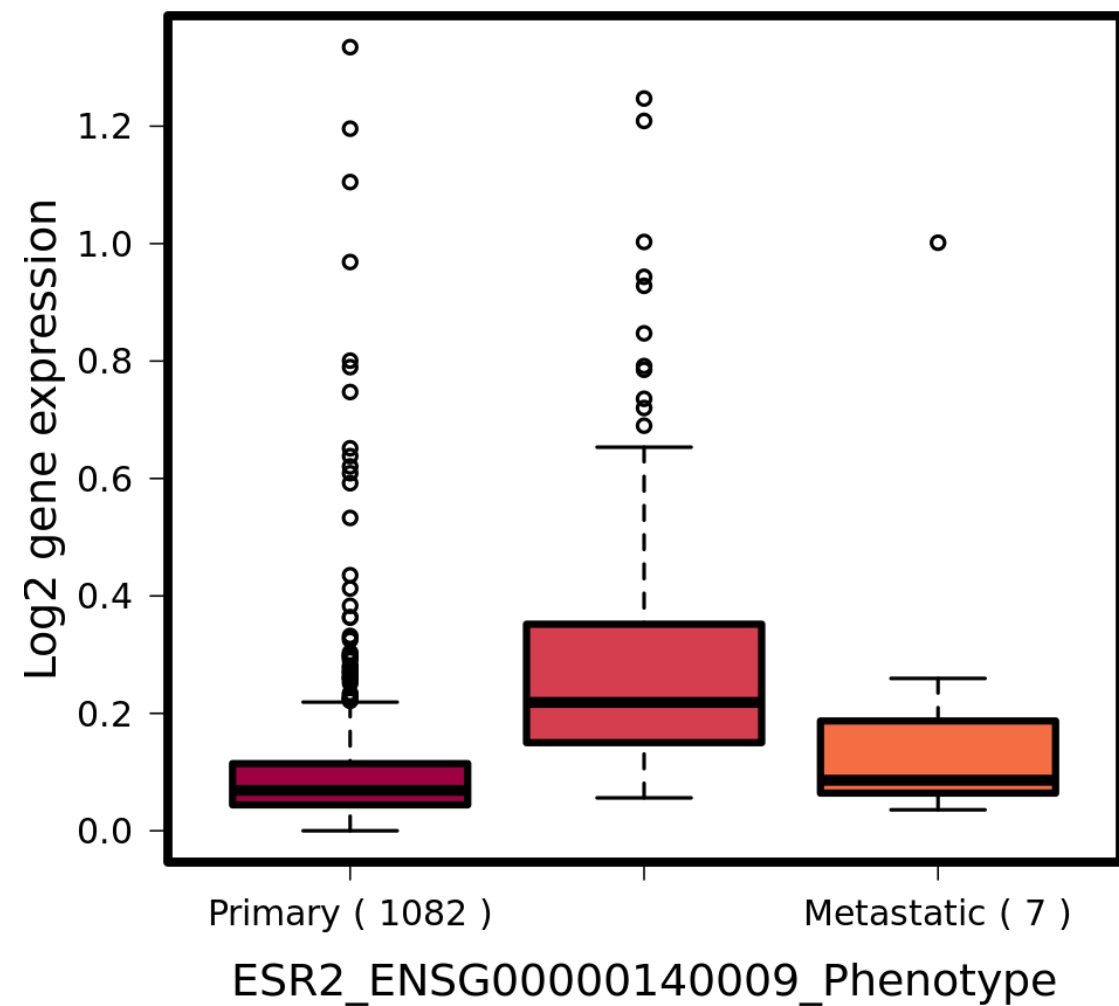

# a) Actein on MDA-MB-453

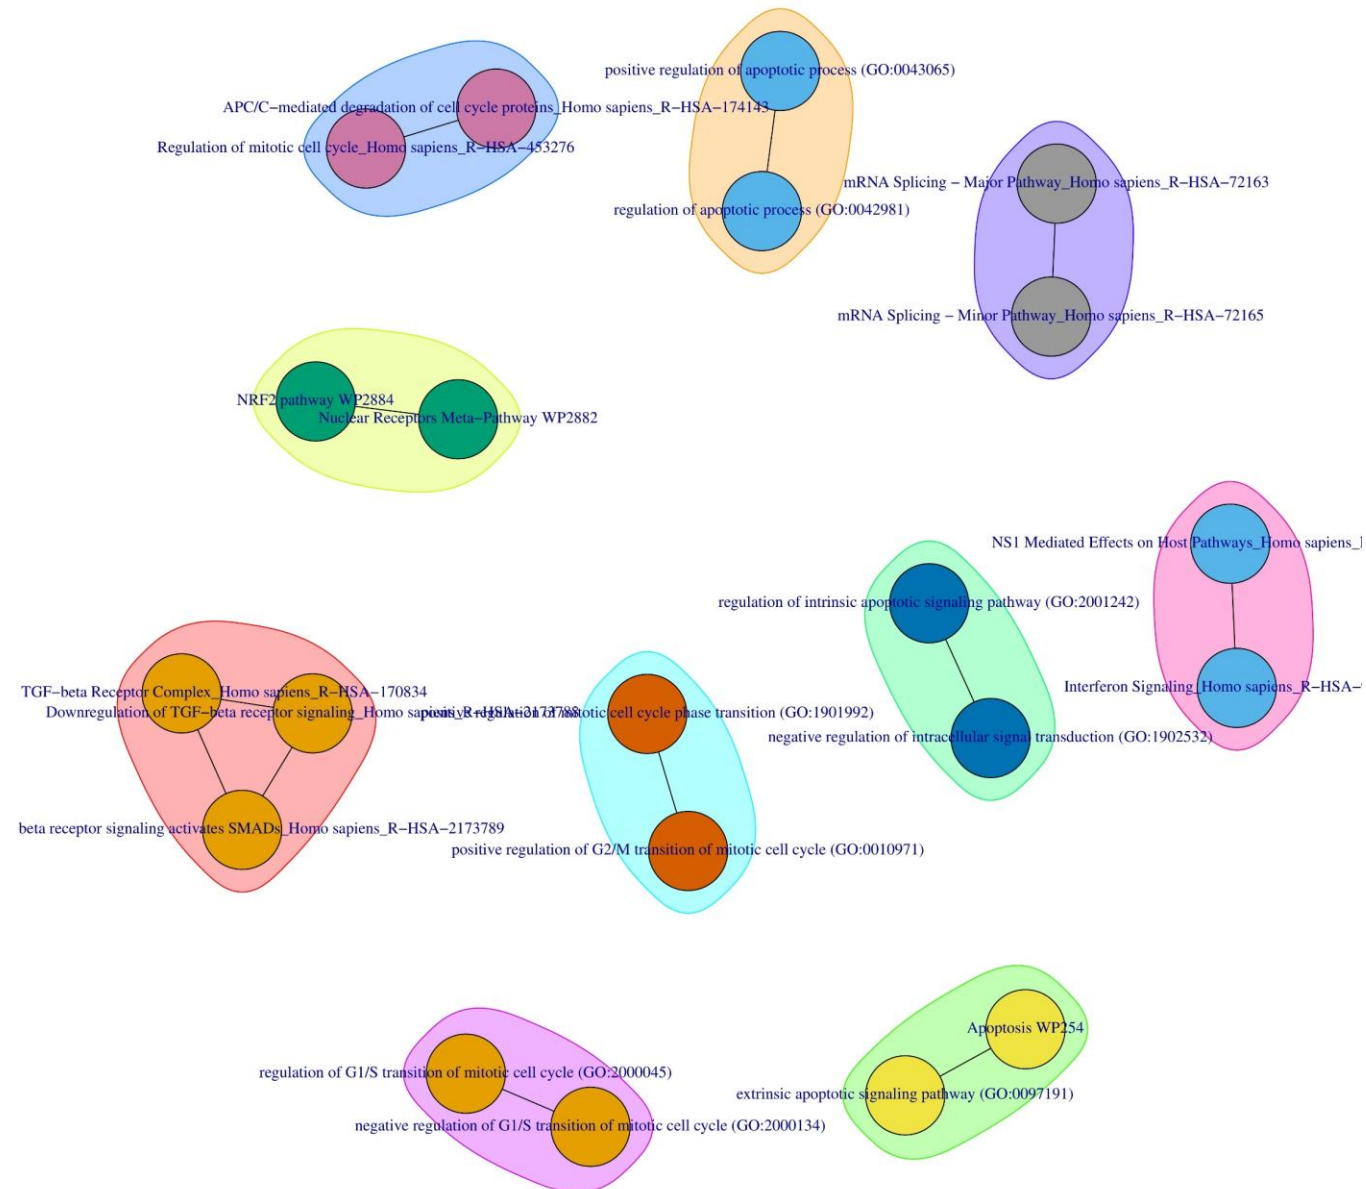

b) Withaferin A on MDA-MB-231

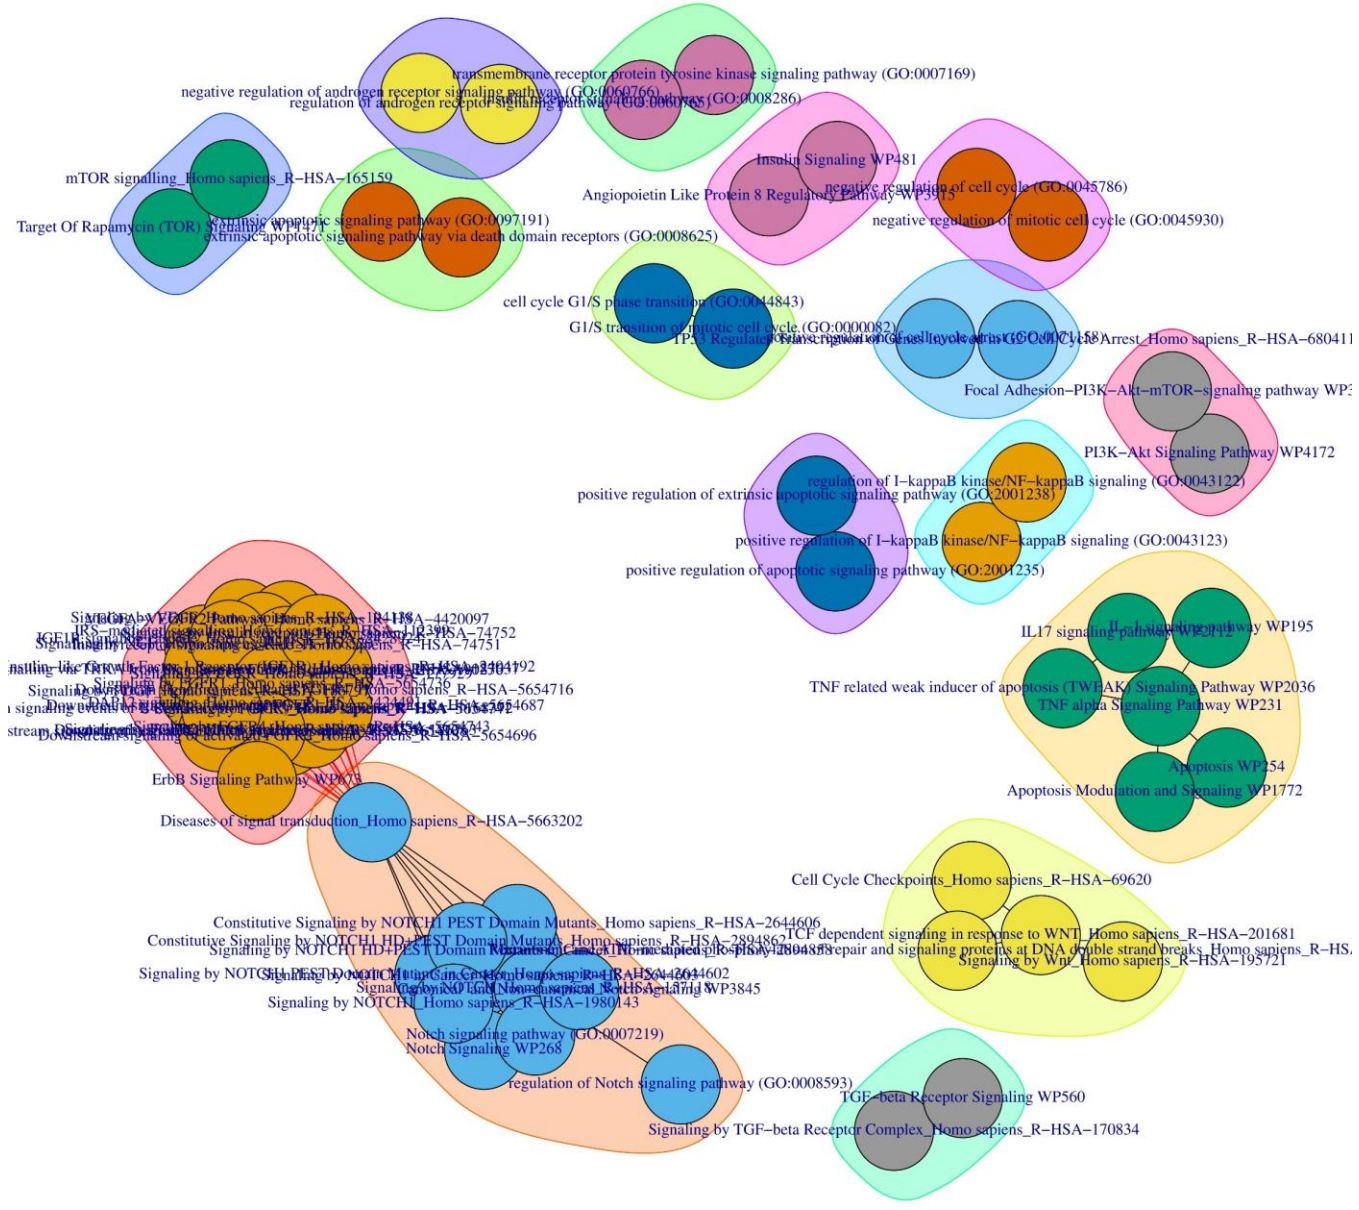

# a) CKI on MCF-7

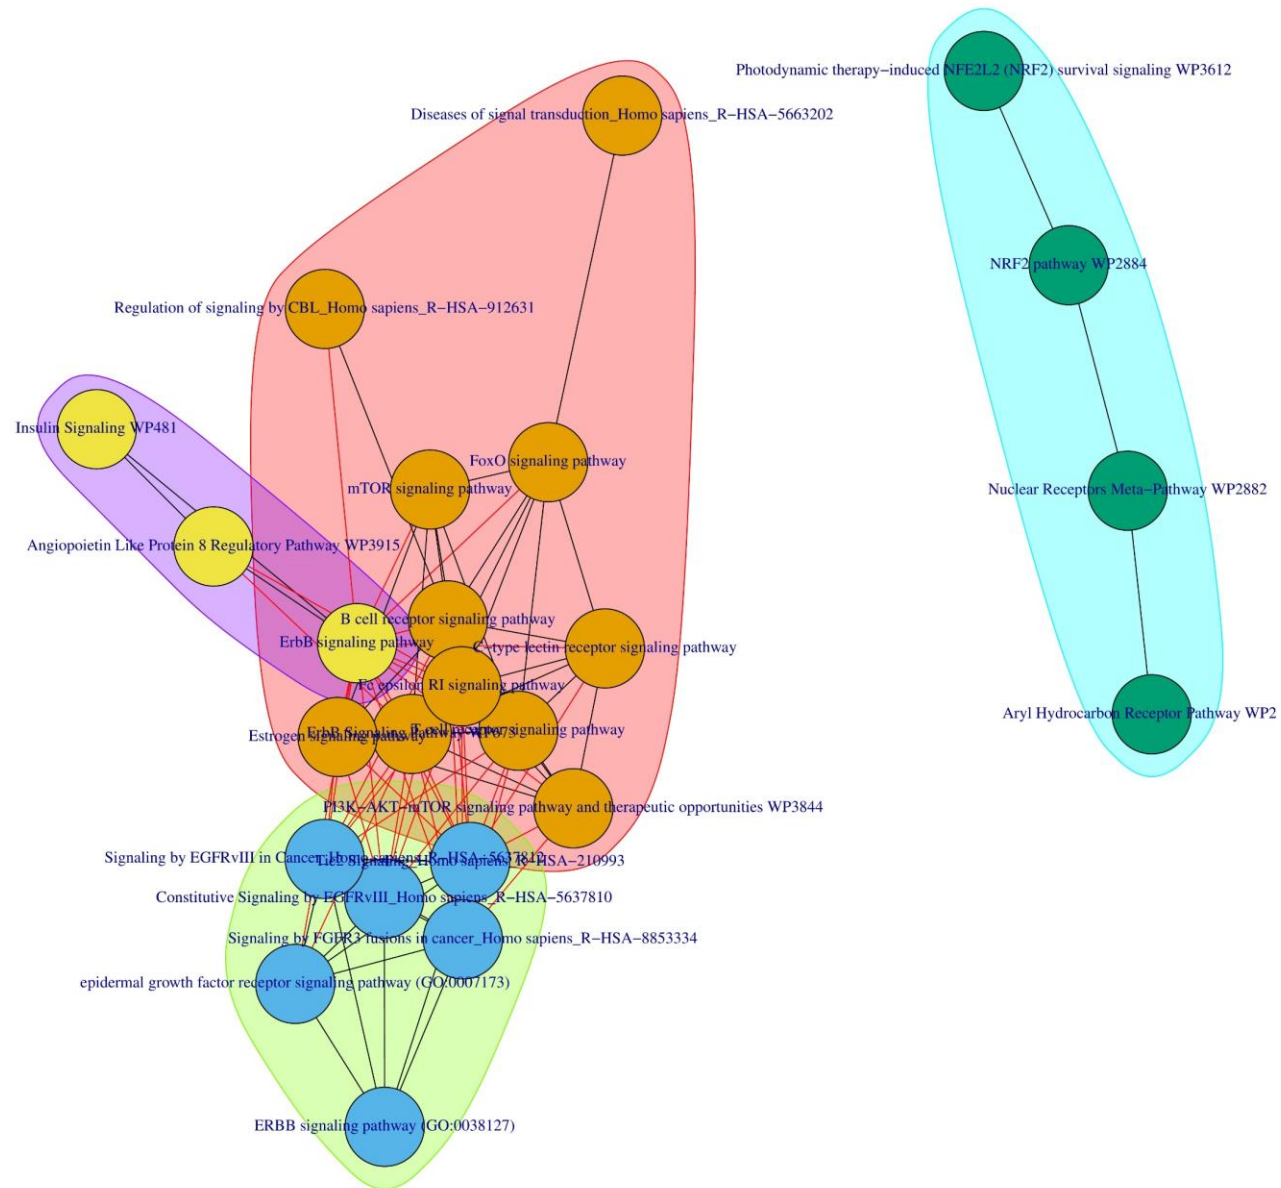

# b) I3C on MCF-7

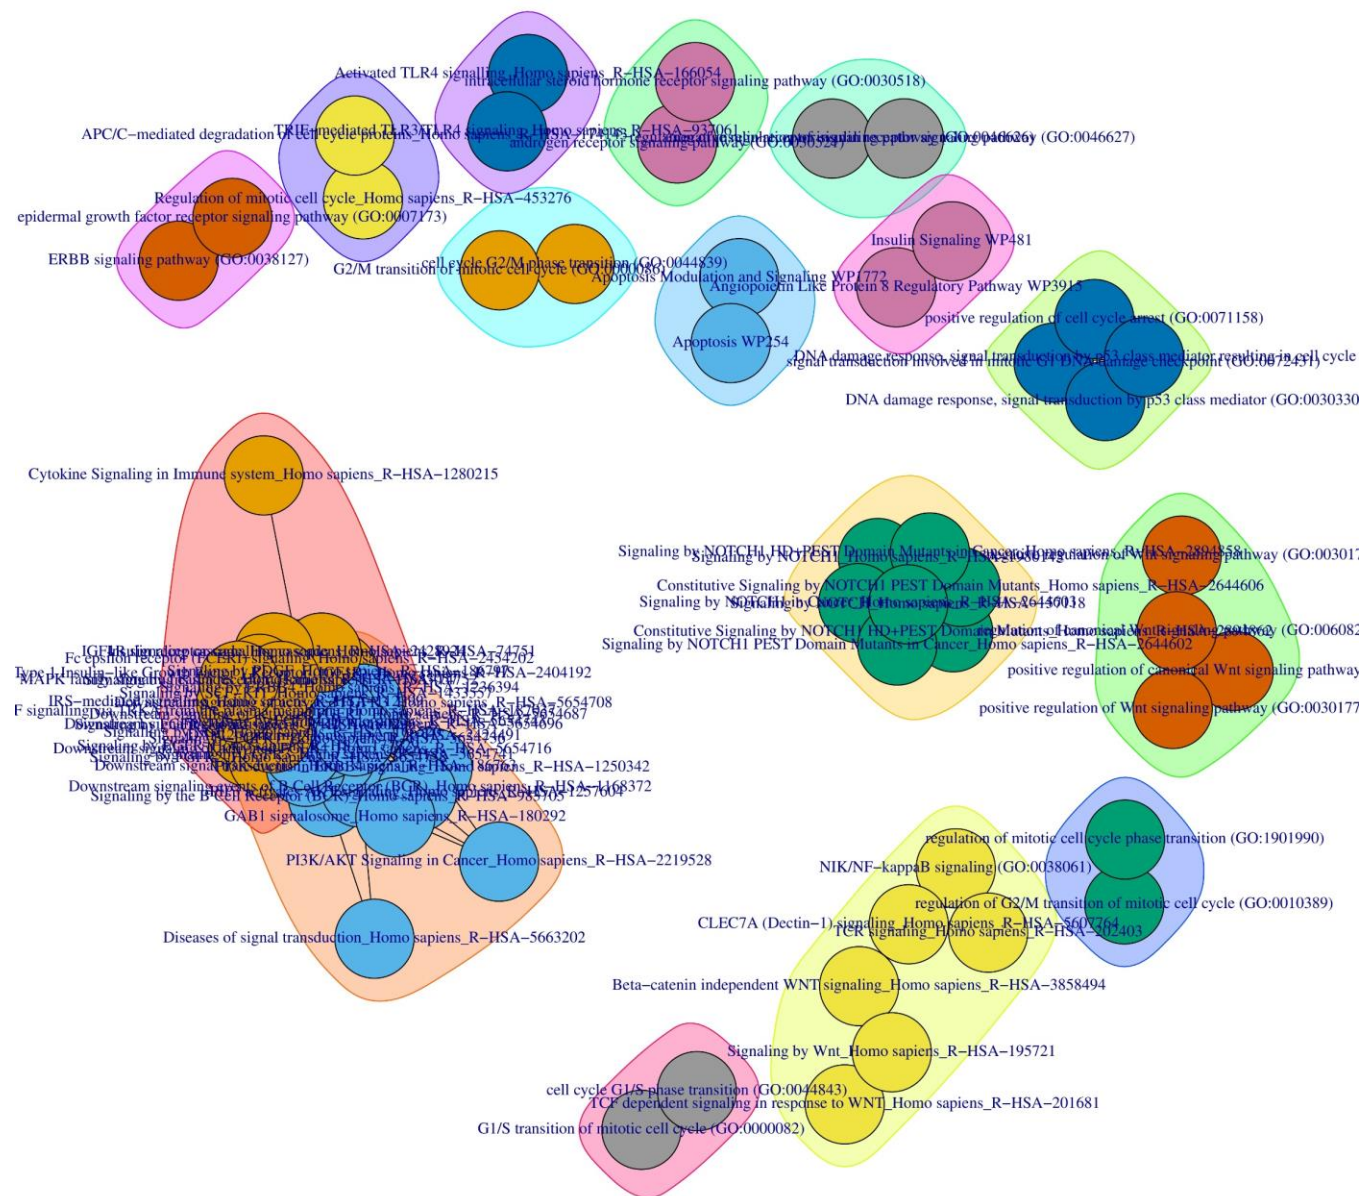

# c) I3C on ZR751

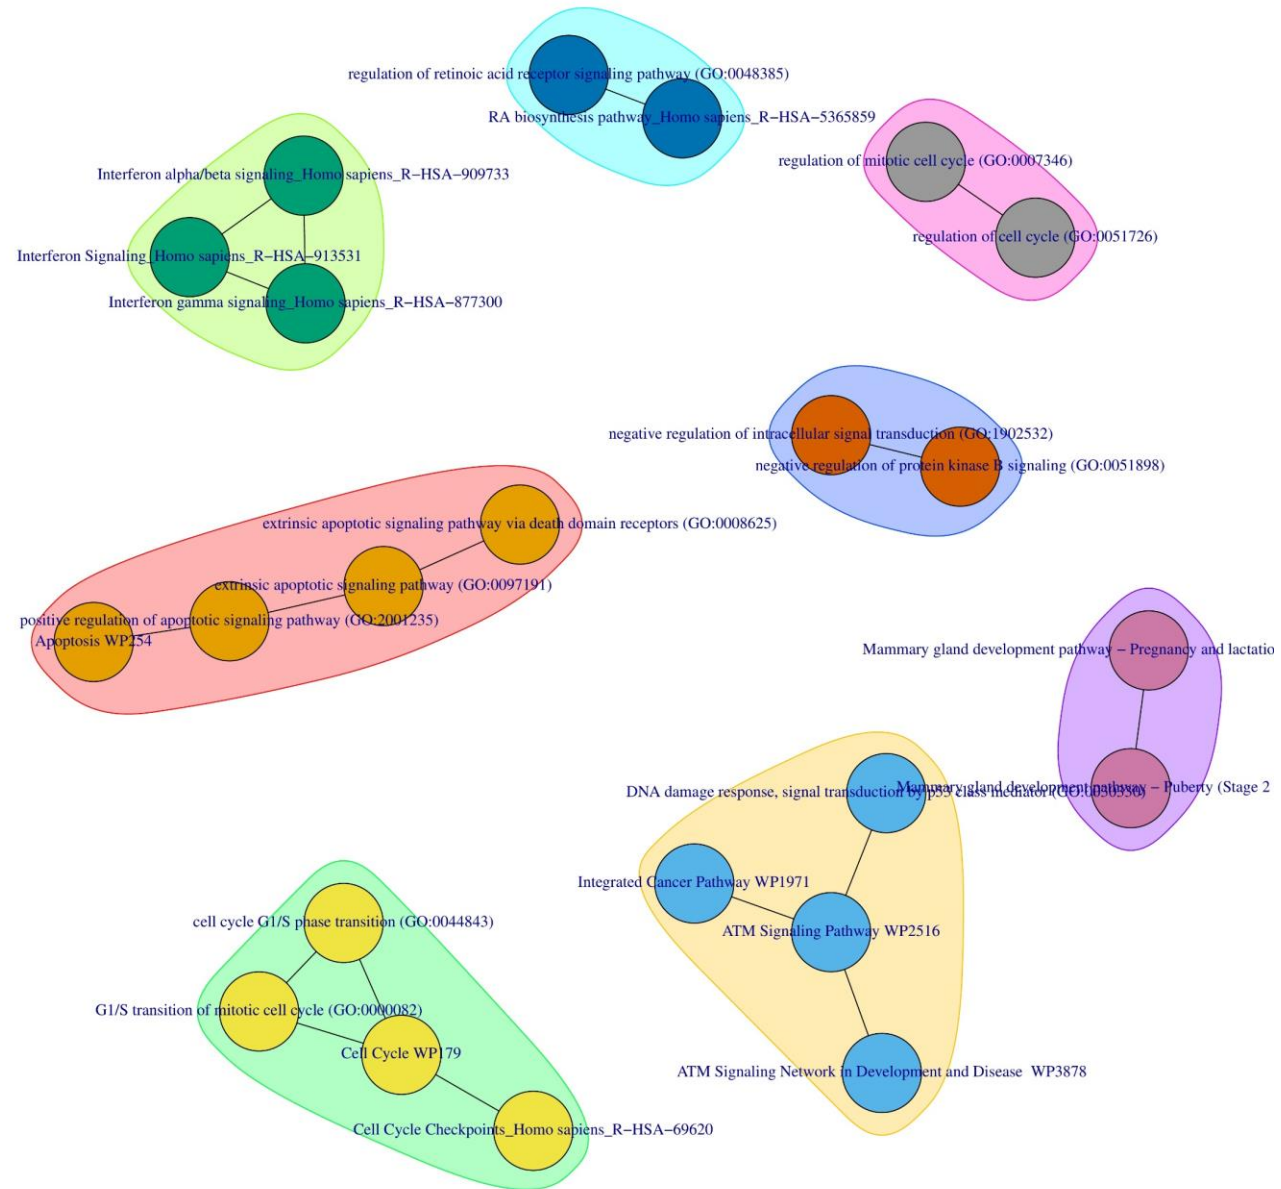



# d) I3C on T47D

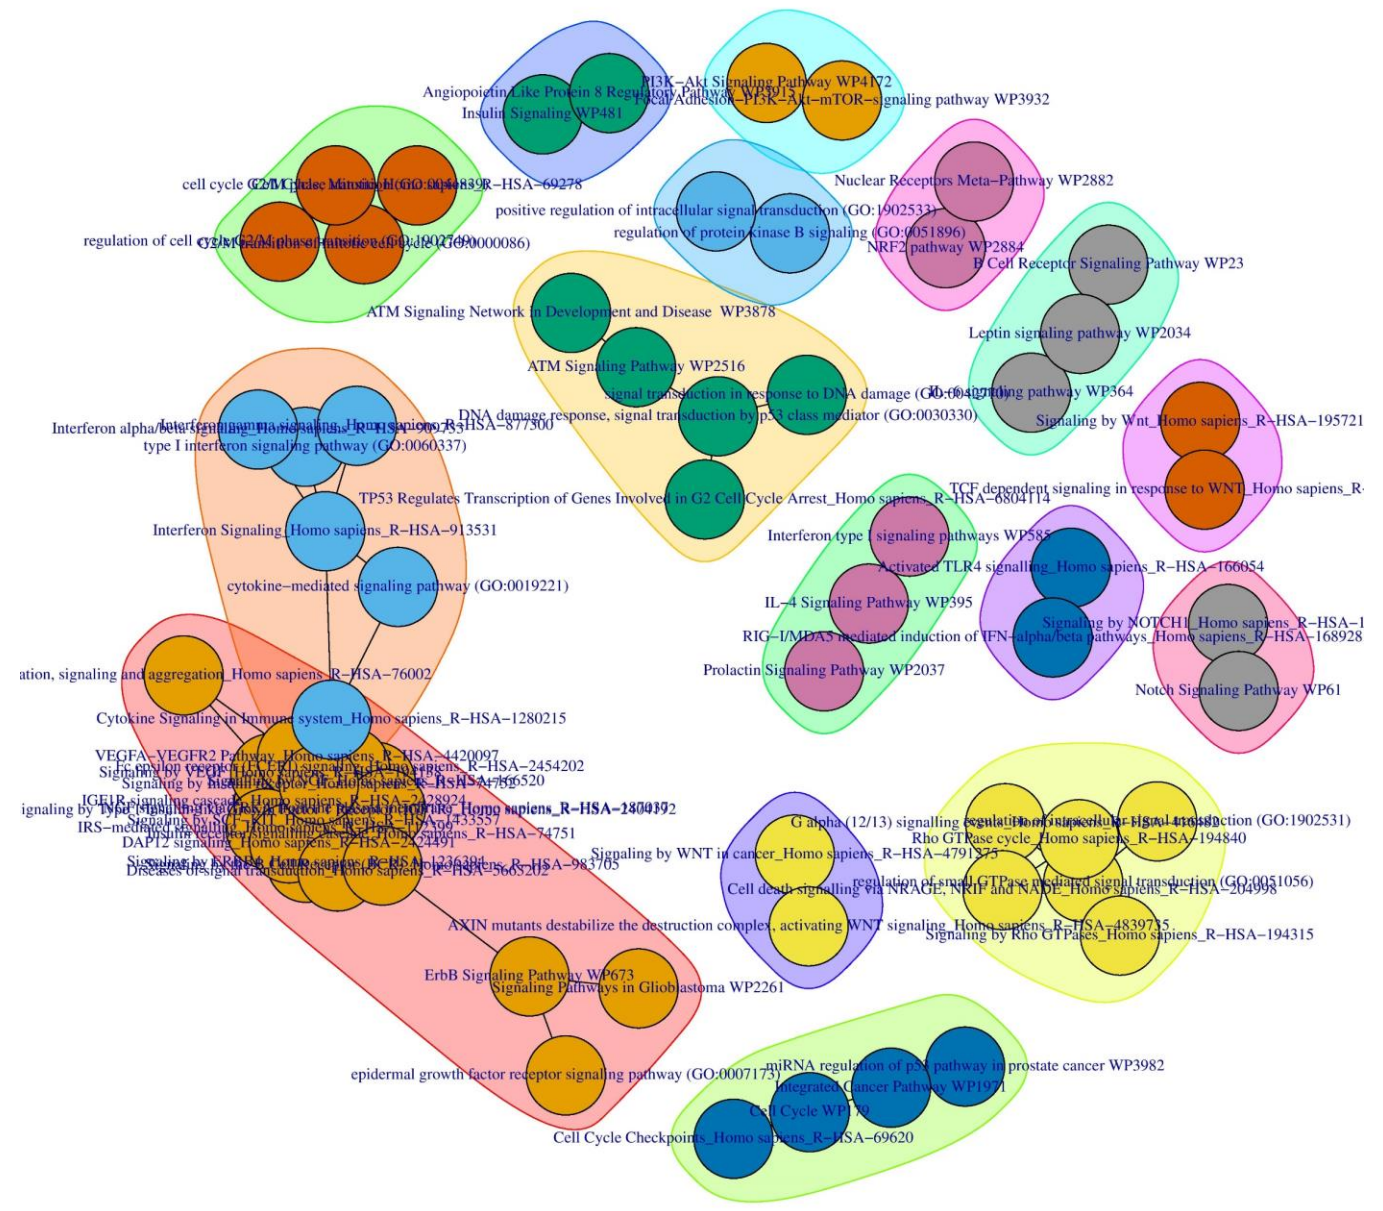

**e) I3C on MDA-MB-436**

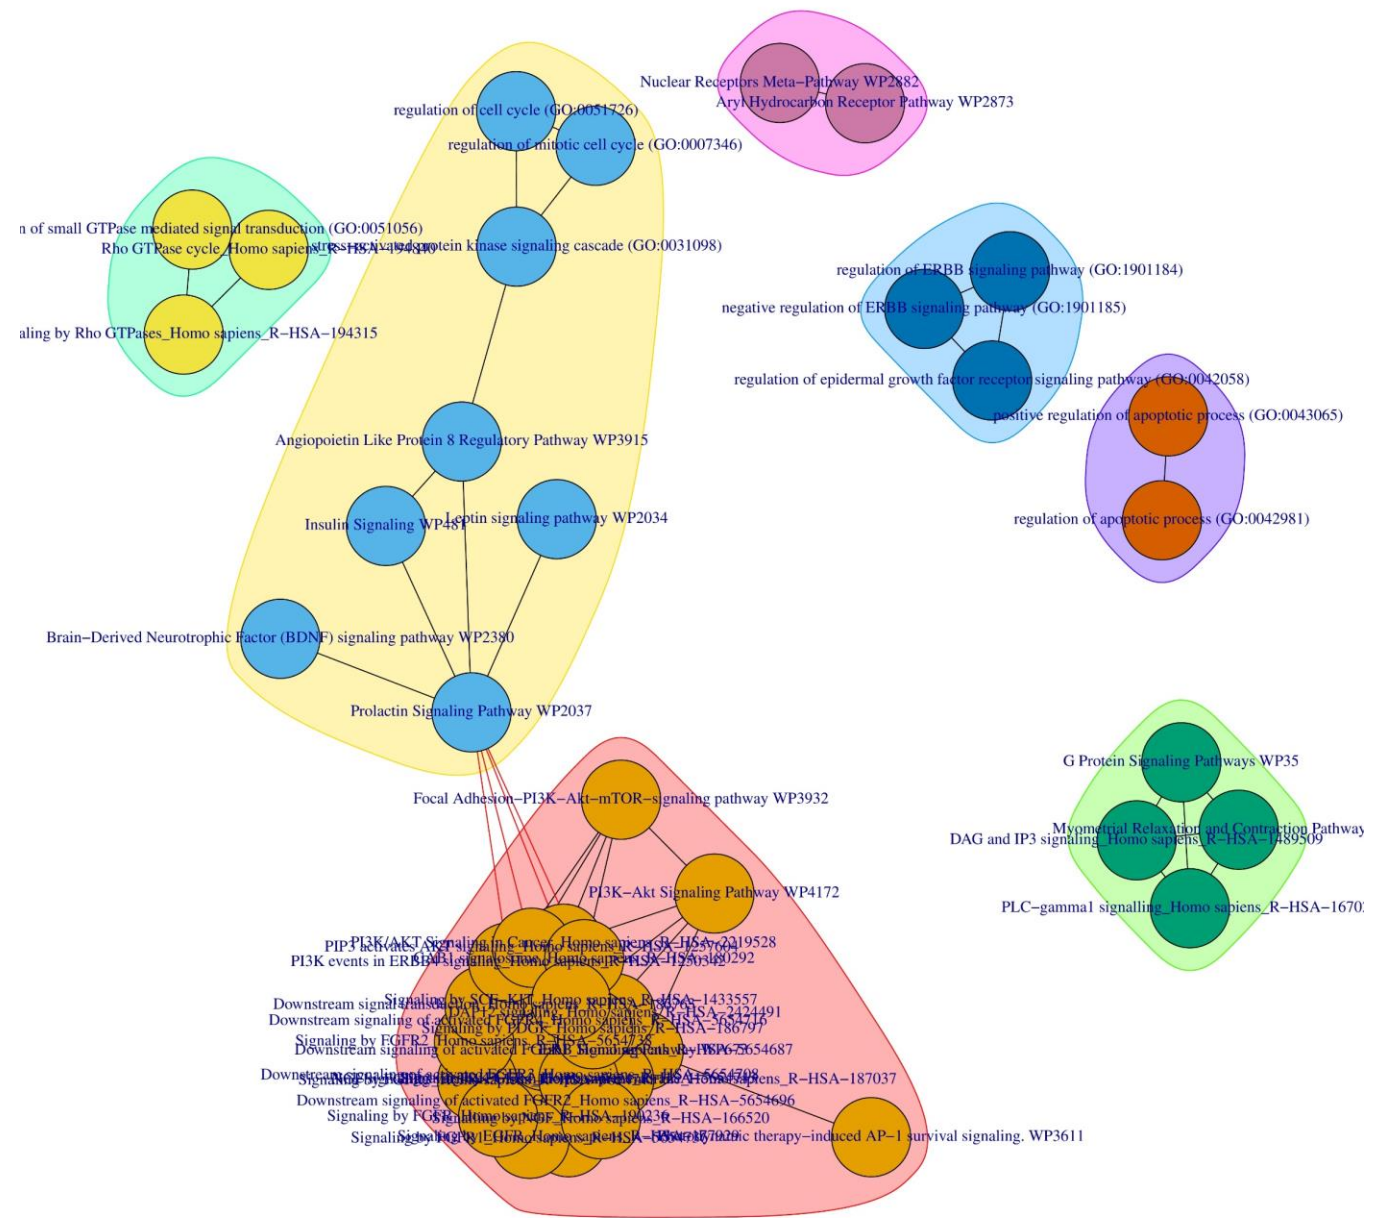

# f) I3C on MDA-MB-231

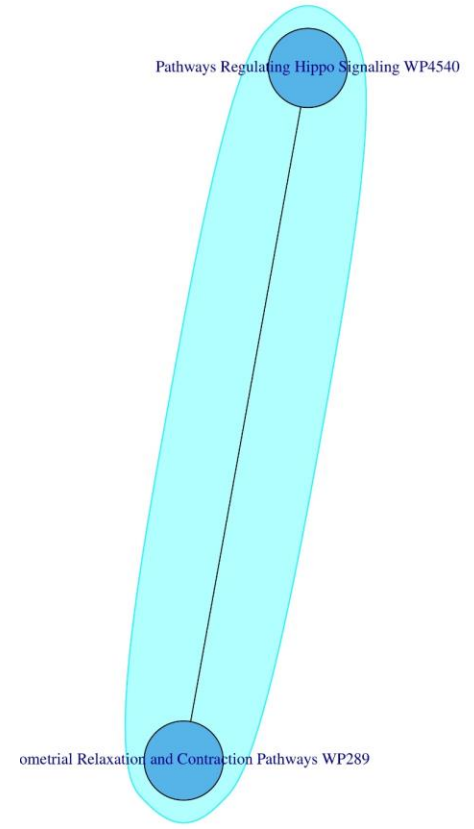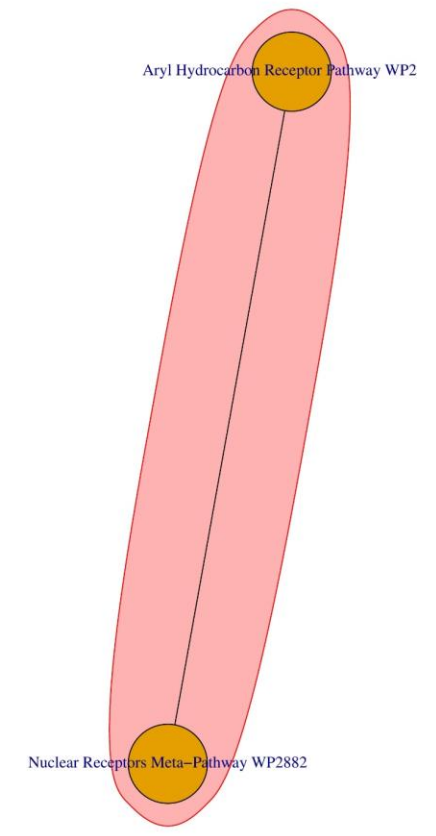

# g) WA on MCF-7

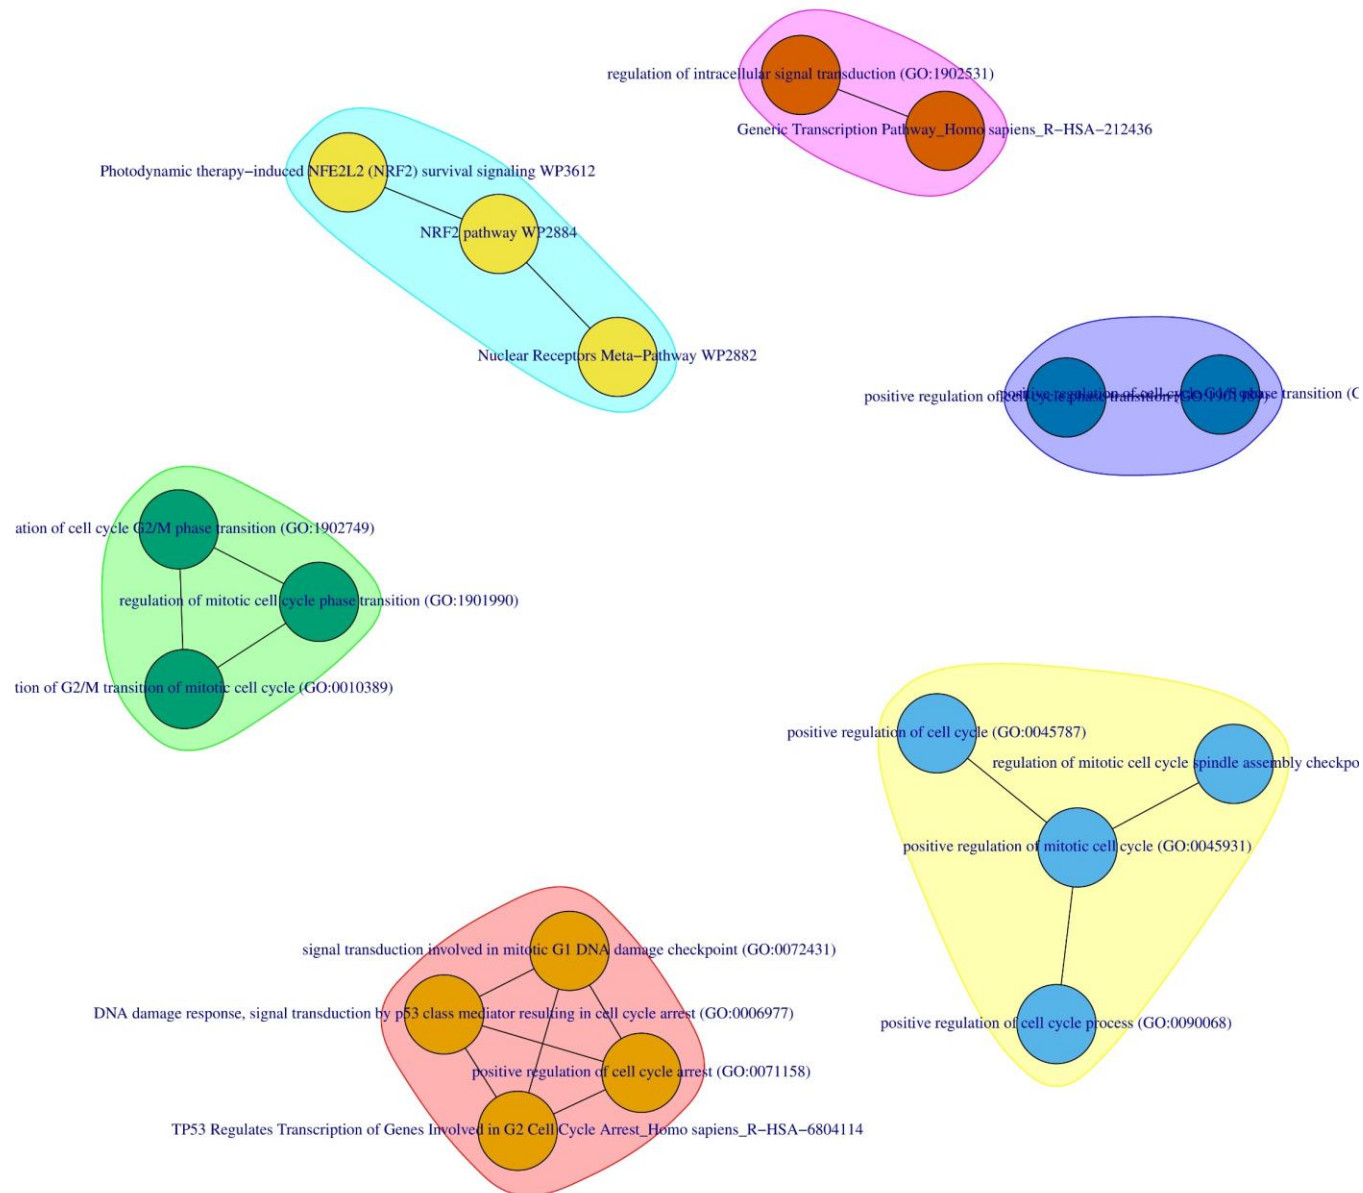

**Table 1: Summary of topological structure of subnetwork solutions indicating the number of proteins and their interactions in each dataset studied. CKI: Compound kushen injection, I3C: Indole-3-carbinol and WA: Withaferin A**

| <b>Drugs</b> | <b>Cell Lines</b> | <b>Genes</b> | <b>Interactions</b> |      | <b>Genes</b> | <b>Interactions</b> |     |
|--------------|-------------------|--------------|---------------------|------|--------------|---------------------|-----|
| Actein       | MDA-MB-453        | 829          | 3858                | Up   | 327          | 687                 |     |
|              |                   |              |                     | Down | 455          | 2166                |     |
| CKI          | MCF-7             | 1332         | 9331                | Up   | 933          | 2838                |     |
|              |                   |              |                     | Down | 304          | 1676                |     |
| I3C          | MCF-7             | 1974         | 10684               | Up   | 453          | 1162                |     |
|              |                   |              |                     | Down | 1399         | 6816                |     |
|              | T47D              | 1681         | 7050                | Up   | 620          | 1324                |     |
|              |                   |              |                     | Down | 959          | 3254                |     |
|              | ZR751             | 1403         | 5457                | Up   | 545          | 1105                |     |
|              |                   |              |                     | Down | 961          | 6323                |     |
|              | MDA-MB-231        | 93           | 126                 | Up   | 17           | 17                  |     |
|              |                   |              |                     | Down | 86           | 111                 |     |
|              | MDA-MB-157        | 86           | 110                 | Up   | 18           | 19                  |     |
|              |                   |              |                     | Down | 75           | 106                 |     |
|              | MDA-MB-436        | 541          | 1275                | Up   | 98           | 120                 |     |
|              |                   |              |                     | Down | 402          | 932                 |     |
|              | WA                | MCF-7        | 333                 | 941  | Up           | 117                 | 353 |
|              |                   |              |                     |      | Down         | 202                 | 564 |
| MDA-MB-231   |                   | 998          | 3277                | Up   | 456          | 1011                |     |
|              |                   |              |                     | Down | 480          | 1208                |     |

**Table 2: Top 5 genes from the subnetworks for each dataset based on their betweenness and degree centrality scores.** The genes are labelled using their respective universal identifiers. ACT: Actein, CKI: Compound kushen injection, I3C: Indole-3-carbinol, and WA: Withaferin A

| ACT (MDA453) | CKI (MCF-7) | I3C (MCF-7) | I3C (MDA-MB-157) | I3C (MDA-MB-231) | I3C (MDA-MB-436) | I3C (T47D) | I3C (ZR751) | WA (MCF-7) | WA (MDA-MB-231) |
|--------------|-------------|-------------|------------------|------------------|------------------|------------|-------------|------------|-----------------|
| APP          | ELAVL1      | TRIM25      | HNRNPL           | HNRNPL           | HNRNPL           | HNRNPL     | HNRNPL      | APP        | TRIM25          |
| TRIM25       | HNRNPL      | ELAVL1      | ESR2             | ELAVL1           | TRIM25           | TRIM25     | TRIM25      | TRIM25     | ELAVL1          |
| ELAVL1       | APP         | ESR2        | TRIM25           | ESR2             | ESR2             | ELAVL1     | ELAVL1      | ESR2       | APP             |
| ESR2         | TRIM25      | HNRNPL      | CUL3             | CUL3             | ELAVL1           | ESR2       | APP         | ELAVL1     | RNF4            |
| HNRNPL       | RNF4        | APP         | BAG3             | CDH1             | APP              | APP        | RNF4        | HNRNPL     | NXF1            |

**Table 3: Grouping of targeted canonical oncogenic signaling pathways based on related cancer pathophysiologic processes.** Three major oncological processes defining the diverse molecular processes associated with carcinogenesis were used to deduce biological roles of the various enriched oncological signaling pathways.

| Drug | Carcinogenesis process |          |                                                                                                                                                                                                                                            |                                                   |                                          |
|------|------------------------|----------|--------------------------------------------------------------------------------------------------------------------------------------------------------------------------------------------------------------------------------------------|---------------------------------------------------|------------------------------------------|
|      | Cell Line              | Activity | Cell cycle/Proliferation and Apoptosis                                                                                                                                                                                                     | Metastasis and invasion                           | Angiogenesis                             |
| ACT  | MDA-MB-453             | Down     | Intrinsic Pathway for Apoptosis<br>PTK6 Regulates Cell Cycle<br>Interferon Signaling                                                                                                                                                       | -                                                 | -                                        |
|      |                        | Up       | PI3K-Akt-mTOR<br>NRF2 pathway<br>TGF-beta Signaling Pathway                                                                                                                                                                                | -                                                 | -                                        |
| CKI  | MCF-7                  | Down     | p53 signaling pathway<br>regulation of intrinsic<br>apoptotic signaling pathway                                                                                                                                                            | -                                                 | -                                        |
|      |                        | Up       | PI3K-AKT-mTOR signaling<br>pathway and therapeutic<br>opportunities<br>EGF/EGFR Signaling<br>Pathway<br>NRF2 pathway<br>Fc epsilon RI signaling<br>pathway<br>T cell receptor signaling<br>pathway<br>B cell receptor signaling<br>pathway | Canonical and<br>Non-Canonical<br>TGF-B signaling | VEGFA-<br>VEGFR2<br>Signaling<br>Pathway |
| WA   | MCF-7                  | Down     | p53 signaling pathway<br>NF-kB activation through<br>FADD/RIP-1 pathway<br>mediated by caspase-8 and -<br>10<br>Interferon Signaling<br>Cytokine Signaling in<br>Immune system                                                             | -                                                 | TGF-beta<br>Signaling<br>Pathway         |
|      |                        | Up       | NRF2 pathway<br>MAPK Signaling Pathway<br>p53 signaling pathway<br>intrinsic apoptotic signaling<br>pathway                                                                                                                                | -                                                 | -                                        |
|      | MDA-MB-231             | Down     | NRF2 pathway<br>MAPK signaling pathway<br>ErbB Signaling Pathway<br>p53 signaling pathway<br>TGF-beta Signaling Pathway<br>Notch Signaling Pathway<br>IL-4 Signaling Pathway<br>IL17 signaling pathway                                     | TCF dependent<br>signaling in<br>response to WNT  | -                                        |
|      |                        | Up       | PI3K-Akt Signaling Pathway<br>Interferon Signaling<br>TNF signaling pathway                                                                                                                                                                | Inflammatory<br>Response Pathway                  | VEGFA-<br>VEGFR2<br>Signaling            |

|            |       |      |                                                                                                                                                                                                                                                                                                        |                                                                                                       |                                                          |
|------------|-------|------|--------------------------------------------------------------------------------------------------------------------------------------------------------------------------------------------------------------------------------------------------------------------------------------------------------|-------------------------------------------------------------------------------------------------------|----------------------------------------------------------|
|            |       |      |                                                                                                                                                                                                                                                                                                        |                                                                                                       | Pathway<br>Notch (U)<br>TGF-beta<br>Signaling<br>Pathway |
| I3C        | MCF-7 | Down | TP53 Regulates Transcription of Cell Cycle Genes<br>Signaling by EGFR<br>Apoptosis<br>PI3K-AKT-mTOR signaling pathway and therapeutic opportunities<br>MAPK Signaling Pathway<br>Wnt Signaling Pathway and Pluripotency<br>T-Cell Receptor and Co-stimulatory Signaling<br>TNF alpha Signaling Pathway | TGF-beta Receptor Signaling                                                                           | -                                                        |
|            |       | Up   | Apoptosis regulation of cell cycle                                                                                                                                                                                                                                                                     | -                                                                                                     | -                                                        |
| T47D       |       | Down | Cell Cycle, Mitotic ErbB Signaling Pathway<br>PI3K-Akt Signaling Pathway<br>Chemokine signaling pathway                                                                                                                                                                                                | Signaling by NOTCH1 in Cancer<br>Wnt Signaling Pathway and Pluripotency<br>TGF-beta Signaling Pathway | VEGFA-VEGFR2 Signaling Pathway<br>PDGF Pathway           |
|            |       | Up   | RIG-I-like Receptor Signaling<br>Apoptosis<br>MAPK Signaling Pathway<br>Interferon gamma signaling<br>TGF-beta Signaling Pathway                                                                                                                                                                       | -                                                                                                     | -                                                        |
| ZR751      |       | Down | EGF/EGFR Signaling Pathway<br>Notch Signaling Pathway<br>TGF-beta Signaling Pathway regulation of apoptotic process<br>Negative regulators of RIG-I/MDA5 signaling                                                                                                                                     | Wnt Signaling Pathway and Pluripotency                                                                | VEGFA-VEGFR2 Signaling Pathway                           |
|            |       | Up   | Interferon Signaling<br>NRF2 pathway<br>Apoptosis<br>MAPK Signaling Pathway                                                                                                                                                                                                                            | -                                                                                                     | -                                                        |
| MDA-MB-231 |       | Down | -                                                                                                                                                                                                                                                                                                      | Pathways Regulating Hippo Signaling                                                                   | VEGFA-VEGFR2 Signaling Pathway                           |
|            |       | Up   | NRF2 pathway                                                                                                                                                                                                                                                                                           | -                                                                                                     | -                                                        |
| MDA-MB-436 |       | Down | ErbB Signaling Pathway                                                                                                                                                                                                                                                                                 | Wnt Signaling                                                                                         | PDGF(D)<br>TGF-beta                                      |



|  |  |    |                                                                                                                                    |                                                                                                   |                      |
|--|--|----|------------------------------------------------------------------------------------------------------------------------------------|---------------------------------------------------------------------------------------------------|----------------------|
|  |  |    | PI3K-Akt Signaling Pathway<br>MAPK Signaling Pathway                                                                               | Pathway and<br>Pluripotency<br>Hippo(D)<br>T-Cell Receptor<br>and Co-<br>stimulatory<br>Signaling | Signaling<br>Pathway |
|  |  | Up | Apoptosis-related network<br>due to altered Notch3 in<br>ovarian cancer<br>TGF-beta Signaling Pathway<br>Activated TLR4 signalling | -                                                                                                 | -                    |
